# Supplementary material for: Identification and Validation of a Novel Biologics Target in Triple Negative Breast Cancer
Source: Sci Rep. 2019 Oct 17;9:14934. doi: 10.1038/s41598-019-51453-w (PMC6797726; doi:10.1038/s41598-019-51453-w)
Supplement: Supplementary file 2 — Supplementary Table 1 [file 41598_2019_51453_MOESM2_ESM.xlsx]

## Sheet: TN-OverExpressed_Probesets
probeset	FoldDiff.MDACC	mean.TN.MDACC	FoldDiff.lancetWang (GSE12276)	mean.TN.lancetWang (GSE12276)	accNum	entrezID	geneSymbol	geneName	ChrLoc	Rank in dataset TOP (GSE16446)	Rank in dataset Paris (GSE13787)	Rank in dataset IPC (GSE21653)	Rank in dataset Boston_2 (GSE19615)	Rank in dataset expO (GSE2109)	Rank in dataset San Francisco (http://www.ebi.ac.uk/arrayexpress/experiments/E-TABM-158/)	Rank in dataset Boston (GSE3744)	Rank in dataset Rotterdam-EMC344 (GSE2034, GSE5327)	Rank in pooled datasets of 4467 samples
205044_at	8.17965	1397.78	12.7596	6585.24	NM_014211	2568	GABRP	gamma-aminobutyric acid (GABA) A receptor, pi	5:170143342	1	2	2	3	2	2	2	3	2
204259_at	7.61189	1706.82	6.92541	6926.61	NM_002423	4316	MMP7	matrix metallopeptidase 7 (matrilysin, uterine)	11:-101896449	20	66	20	18	27	19	142	18	40
220559_at	5.29968	262.013	11.569	1248.03	NM_001426	2019	EN1	engrailed homeobox 1	2:-119316216	15	12	12	5	6	6	45	16	11
220625_s_at	5.0399	664.711	8.28823	3858.04	AF115403	2001	ELF5	E74-like factor 5 (ets domain transcription factor)	11:-34456917	12	32	9	7	20	4	3	8	6
206392_s_at	4.8896	913.13	6.72246	2466.95	NM_002888	5918	RARRES1	retinoic acid receptor responder (tazarotene induced) 1	3:-159905133; 3:-159897592	85	59	17	12	15	17	4	7	4
209395_at	4.27527	902.156	5.85991	3153.61	M80927	1116	CHI3L1	chitinase 3-like 1 (cartilage glycoprotein-39)	1:-201414681	65	16	25	64	13	18	611	5	14
210933_s_at	4.09606	1105.39	1.75572	264.211	BC004908	84752	MGC4655	hypothetical protein MGC4655	16:-65739506	43	73	247	146	188	143	617	268	123
204885_s_at	3.93913	102.45	8.84068	398.084	NM_005823	10232	MSLN	mesothelin	16:751133	16	11	30	16	101	29	147	2	17
202037_s_at	3.68425	828.062	4.7434	6623.14	NM_003012	6422	SFRP1	secreted frizzled-related protein 1	8:-41238635	18	7	15	26	73	8	41	13	37
210147_at	3.66589	246.023	6.09589	586.517	U47054	419	ART3	ADP-ribosyltransferase 3	4:77214886	11	4	8	6	9	12	11	55	23
220425_x_at	3.16579	249.297	4.95022	865.27	NM_017578	54763	ROPN1	ropporin, rhophilin associated protein 1	3:-125170570	5	8	27	9	17	7	31	31	36
209842_at	3.1089	441.217	8.83549	1415.78	AI367319	6663	SOX10	SRY (sex determining region Y)-box 10	22:-36698265	7	5	13	20	78	11	84	21	20
213338_at	2.99792	486.753	4.23828	1544.66	BF062629	25907	TMEM158	transmembrane protein 158	3:-45240960	61	30	133	23	61	71	6	68	62
204855_at	2.96431	324.722	5.81174	1413.95	NM_002639	5268	SERPINB5	serpin peptidase inhibitor, clade B (ovalbumin), member 5	18:59295198	10	35	16	19	8	15	123	25	9
202345_s_at	2.93773	1403.58	2.33738	3425.84	NM_001444	2171	FABP5	fatty acid binding protein 5 (psoriasis-associated)	8:82355339	180	120	132	95	56	120	627	204	67
209283_at	2.89994	1277.05	3.7594	2989.79	AF007162	1410	CRYAB	crystallin, alpha B	11:-111284559	31	46	35	30	57	44	615	54	79
215729_s_at	2.8557	200.593	28.885	1144.29	BE542323	51442	VGLL1	vestigial like 1 (Drosophila)	X:135441976	9	49	1	1	3	1	5	1	1
210683_at	2.85447	44.0281	11.0501	99.2127	AL161995	4902	NRTN	neurturin	19:5774817	14	6	28	28	31	76	595	6	8
219795_at	2.84761	128.678	6.58468	648.703	NM_007231	11254	SLC6A14	solute carrier family 6 (amino acid transporter), member 14	X:115481817	27	377	11	24	69	21	129	52	19
202342_s_at	2.81345	228.918	2.95045	1029.15	NM_015271	23321	TRIM2	tripartite motif-containing 2	4:154345067	68	50	80	54	98	89	51	100	75
212190_at	2.80985	715.709	2.02151	2805.51	AL541302	5270	SERPINE2	serpin peptidase inhibitor, clade E (nexin, plasminogen activator inhibitor type 1), member 2	2:-224548121	181	89	152	172	288	230	118	509	429
205890_s_at	2.80498	1236.36	2.9326	5108.57	NM_006398	10537	UBD	ubiquitin D	6_cox_hap1:-978728	138	132	73	140	117	41	7	29	113
204304_s_at	2.77056	582.714	4.2953	3637.19	NM_006017	8842	PROM1	prominin 1	4:-15578954	256	113	5	8	11	16	12	12	5
201387_s_at	2.7512	451.129	3.36098	1562.1	NM_004181	7345	UCHL1	ubiquitin carboxyl-terminal esterase L1 (ubiquitin thiolesterase)	4:40953685	80	29	89	99	54	97	302	141	198
204580_at	2.72978	550.887	3.42122	1164.82	NM_002426	4321	MMP12	matrix metallopeptidase 12 (macrophage elastase)	11:-102238673	32	393	22	82	10	26	61	79	22
209644_x_at	2.64586	802.308	3.40715	2248.33	U38945	1029	CDKN2A	cyclin-dependent kinase inhibitor 2A (melanoma, p16, inhibits CDK4)	9:-21957751	56	41	77	47	122	69	579	129	119
221510_s_at	2.62308	354.757	2.00214	1018.58	AF158555	2744	GLS	glutaminase	2:191453791	99	130	213	133	183	207	108	307	115
209900_s_at	2.60526	174.306	2.09006	356.138	AL162079	6566	SLC16A1	solute carrier family 16, member 1 (monocarboxylic acid transporter 1)	1:-113255994	58	84	128	84	135	233	181	344	58
208747_s_at	2.56842	1232.81	1.47898	7171.73	M18767	716	C1S	complement component 1, s subcomponent	12:7038281; 12:7038277	437	532	497	631	628	331	646	196	621
216841_s_at	2.52304	309.795	3.08256	587.279	X15132	6648	SOD2	superoxide dismutase 2, mitochondrial	6:-160020140; 6:-160022744	287	177	202	113	96	142	609	104	42
213564_x_at	2.51971	2506.84	2.24917	10825.7	BE042354	3945	LDHB	lactate dehydrogenase B	12:-21679544	122	71	109	101	120	117	482	76	80
206373_at	2.47539	191.538	8.00153	771.581	NM_003412	7545	ZIC1	Zic family member 1 (odd-paired homolog, Drosophila)	3:148609870	2	1	7	4	1	3	69	11	3
200824_at	2.46188	1205.23	2.37646	3151.99	NM_000852	2950	GSTP1	glutathione S-transferase pi	11:67107861	151	598	76	92	62	124	106	270	185
201215_at	2.45317	470.171	1.46842	3713.34	NM_005032	5358	PLS3	plastin 3 (T isoform)	X:114701764	182	281	532	395	403	498	504	467	366
212771_at	2.45109	406.13	3.00917	1680.48	AU150943	221061	C10orf38	chromosome 10 open reading frame 38	10:-15293652	48	68	68	89	131	52	323	75	91
209291_at	2.45076	426.468	2.51966	1614.87	AW157094	3400	ID4	inhibitor of DNA binding 4, dominant negative helix-loop-helix protein	6:19945595	110	80	103	71	200	103	357	46	72
210163_at	2.44136	140.686	2.19855	689.898	AF030514	6373	CXCL11	chemokine (C-X-C motif) ligand 11	4:-77173865	609	565	121	42	113	55	240	56	68
204533_at	2.41738	995.802	2.83177	5721.09	NM_001565	3627	CXCL10	chemokine (C-X-C motif) ligand 10	4:-77161294	567	553	66	44	86	83	37	64	93
203868_s_at	2.39855	284.27	1.94001	1684.29	NM_001078	7412	VCAM1	vascular cell adhesion molecule 1	1:100957884	627	556	209	411	254	173	196	92	304
205334_at	2.34427	930.824	4.79276	1950.79	NM_006271	6271	S100A1	S100 calcium binding protein A1	1:151867496	23	13	304	45	414	81	162	48	535
201300_s_at	2.34192	1095.55	1.72573	2651.44	NM_000311	5621	PRNP	prion protein (p27-30) (Creutzfeldt-Jakob disease, Gerstmann-Strausler-Scheinker syndrome, fatal familial insomnia)	20:4614796; 20:4615156	336	279	323	304	354	227	305	154	166
213060_s_at	2.33377	619.314	2.87048	1048.13	U58515	1117	CHI3L2	chitinase 3-like 2	1:111571803; 1:111573855	54	67	67	59	51	94	363	51	136
209122_at	2.32975	1433.4	1.87056	2806.32	BC005127	123	ADFP	adipose differentiation-related protein	9:-19105759	479	478	172	247	182	320	260	143	120
209211_at	2.3297	237.735	2.43648	250.097	AF132818	688	KLF5	Kruppel-like factor 5 (intestinal)	13:72531142	44	236	61	160	107	73	87	485	44
206560_s_at	2.26498	473.493	11.6034	2182.9	NM_006533	8190	MIA	melanoma inhibitory activity	19:45973139	6	10	29	15	32	13	42	4	18
207030_s_at	2.26149	556.771	2.78322	1973.73	NM_001321	1466	CSRP2	cysteine and glycine-rich protein 2	12:-75776626	108	286	108	209	234	219	644	33	45
209290_s_at	2.254	597.264	2.23193	4286.2	BC001283	4781	NFIB	nuclear factor I/B	9:-14071847	78	221	104	132	244	85	53	114	100
209170_s_at	2.24697	142.491	2.94368	657.892	AF016004	2824	GPM6B	glycoprotein M6B	X:-13702018; X:-13698982	49	62	120	98	243	84	10	59	53
203126_at	2.22876	475.568	2.72879	1216.18	NM_014214	3613	IMPA2	inositol(myo)-1(or 4)-monophosphatase 2	18:11971454	165	112	71	73	26	119	426	284	106
214038_at	2.21761	496.186	2.6221	1054.57	AI984980	6355	CCL8	chemokine (C-C motif) ligand 8	17:29670178	293	495	148	297	313	121	116	74	107
203706_s_at	2.21077	292.155	1.93788	1608.07	NM_003507	8324	FZD7	frizzled homolog 7 (Drosophila)	2:202607554	76	122	189	267	312	533	515	286	264
205363_at	2.19705	169.071	3.79568	623.903	NM_003986	8424	BBOX1	butyrobetaine (gamma), 2-oxoglutarate dioxygenase (gamma-butyrobetaine hydroxylase) 1	11:27019084	184	305	41	78	97	27	220	10	29
205428_s_at	2.17484	218.178	4.481	1455.22	NM_001740	794	CALB2	calbindin 2, 29kDa (calretinin)	16:69950126	50	86	177	212	229	177	261	22	342
219295_s_at	2.17387	134.397	2.41081	424.73	NM_013363	26577	PCOLCE2	procollagen C-endopeptidase enhancer 2	3:-144019401	84	40	118	239	205	181	403	124	122
212067_s_at	2.17352	597.152	1.41976	3522.2	AL573058	715	C1R	complement component 1, r subcomponent	12:-7057771	436	498	616	657	650	396	636	326	648
202912_at	2.15034	438.028	1.79762	1342.55	NM_001124	133	ADM	adrenomedullin	11:10283217	346	588	146	426	168	254	460	282	124
200600_at	2.14231	1160.75	2.18648	3241.02	NM_002444	4478	MSN	moesin	X:64804235	167	288	325	373	193	248	642	119	345
215049_x_at	2.13907	654.18	1.75224	2382.8	Z22969	9332	CD163	CD163 molecule	12:-7514676	396	657	130	456	415	213	472	91	235
203324_s_at	2.13674	196.636	1.67068	513.376	NM_001233	858	CAV2	caveolin 2	7:115926679	329	636	459	347	508	597	115	552	174
209318_x_at	2.06827	185.147	2.14044	652.724	BG547855	5325	PLAGL1	pleiomorphic adenoma gene-like 1	6:-144303129	90	397	235	417	257	295	326	355	206
205548_s_at	2.06201	464.933	2.2936	1612.68	NM_006806	10950	BTG3	BTG family, member 3	21:-17887842	169	255	112	180	94	151	203	112	196
210605_s_at	2.05958	477.527	4.35219	2064.83	BC003610	4240	MFGE8	milk fat globule-EGF factor 8 protein	15:-87242919	60	57	162	112	150	146	516	84	272
217767_at	2.05186	1039.6	1.62815	8537.16	NM_000064	718	C3	complement component 3	19:-6628846	586	536	565	681	680	385	228	150	677
201743_at	2.05131	667.457	1.65609	1917.22	NM_000591	929	CD14	CD14 molecule	5:-139991500	447	654	362	565	431	360	213	257	496
218868_at	2.04673	178.871	2.28565	471.365	NM_020445	57180	ACTR3B	ARP3 actin-related protein 3 homolog B (yeast)	7:152087783	92	111	195	123	153	267	174	227	109
201012_at	2.03972	787.851	1.50844	5472.83	NM_000700	301	ANXA1	annexin A1	9:74956600	590	358	292	292	255	384	143	471	284
205609_at	2.034	35.6699	1.96611	294.329	NM_001146	284	ANGPT1	angiopoietin 1	8:-108330887	194	149	370	452	512	399	423	535	262
202431_s_at	2.03346	751.509	2.07635	2295.59	NM_002467	4609	MYC	v-myc myelocytomatosis viral oncogene homolog (avian)	8:128817497	52	31	285	249	103	284	303	161	203
206332_s_at	2.02003	548.504	1.62873	2966.94	NM_005531	3428	IFI16	interferon, gamma-inducible protein 16	1:157246305	628	622	355	447	612	348	359	252	367
201656_at	2.0128	734.091	1.72849	1010.73	NM_000210	3655	ITGA6	integrin, alpha 6	2:173000559	79	433	274	332	336	593	657	234	275
202133_at	1.99303	272.657	1.80958	1708.16	BF674349	25937	WWTR1	WW domain containing transcription regulator 1	3:-150720722	203	131	485	460	579	366	324	186	286
202422_s_at	1.97493	128.138	1.59478	175.573	NM_022977	2182	ACSL4	acyl-CoA synthetase long-chain family member 4	X:-108771221	305	386	537	436	391	261	383	209	194
217897_at	1.96206	365.927	1.89582	882.254	NM_022003	53826	FXYD6	FXYD domain containing ion transport regulator 6	11:-117212902	171	215	360	157	638	307	284	275	546
201487_at	1.95331	1132.81	1.82627	3509.75	NM_001814	1075	CTSC	cathepsin C	11:-87666408; 11:-87693629	582	618	142	141	194	203	95	144	159
203256_at	1.94129	961.586	4.93309	2335.96	NM_001793	1001	CDH3	cadherin 3, type 1, P-cadherin (placental)	16:67236276	75	321	34	74	29	24	390	9	30
201506_at	1.92262	1038.76	1.52887	5383.77	NM_000358	7045	TGFBI	transforming growth factor, beta-induced, 68kDa	5:135392596	600	677	466	633	379	680	384	429	560
201426_s_at	1.91961	4358.84	1.44265	20826.9	AI922599	7431	VIM	vimentin	10:17311303	411	590	663	574	675	679	632	340	670
206632_s_at	1.91944	243.907	2.59135	833.387	NM_004900	9582	APOBEC3B	apolipoprotein B mRNA editing enzyme, catalytic polypeptide-like 3B	22:37708350	136	512	129	39	64	61	22	57	48
202146_at	1.91587	209.405	1.9922	991.497	AA747426	3475	IFRD1	interferon-related developmental regulator 1	7:111877750; 7:111850461	199	245	361	415	196	363	285	136	103
222062_at	1.91391	163.321	2.94523	708.029	AI983115	9466	IL27RA	interleukin 27 receptor, alpha	19:14003261	89	23	164	86	189	53	159	73	94
204825_at	1.91256	471.922	2.40926	1772.02	NM_014791	9833	MELK	maternal embryonic leucine zipper kinase	9:36562904	204	77	85	48	42	179	71	96	71
201858_s_at	1.89866	1681.34	1.68005	2107.92	J03223	5552	SRGN	serglycin	10:70517833	490	595	253	222	221	183	39	266	343
213005_s_at	1.89373	475.061	1.65254	1345.43	D79994	23189	KANK1	KN motif and ankyrin repeat domains 1	9:696895; 9:494702	150	97	503	444	515	521	102	548	482
209205_s_at	1.89191	1916.62	2.79967	2302.93	BC003600	8543	LMO4	LIM domain only 4	1:87566738	124	169	94	70	129	87	26	225	140
202269_x_at	1.88966	759.925	2.86521	2811.87	BC002666	2633	GBP1	guanylate binding protein 1, interferon-inducible, 67kDa	1:-89290593	477	402	187	217	167	114	371	45	144
219489_s_at	1.8819	462.345	1.90971	1769.21	NM_017821	54933	RHBDL2	rhomboid, veinlet-like 2 (Drosophila)	1:-39124065	267	511	315	406	346	452	561	259	233
201201_at	1.88126	3531.16	1.74236	8693.55	NM_000100	1476	CSTB	cystatin B (stefin B)	21:-44018259	565	349	438	220	343	359	263	420	501
823_at	1.87627	325.529	2.09527	1035.32	U84487	6376	CX3CL1	chemokine (C-X3-C motif) ligand 1	16:55963914	129	674	149	568	461	198	397	176	381
200827_at	1.86965	423.834	2.12982	1489.8	NM_000302	5351	PLOD1	procollagen-lysine 1, 2-oxoglutarate 5-dioxygenase 1	1:11917332	227	242	347	516	263	395	630	174	407
202626_s_at	1.86121	458.37	2.44053	1204.25	NM_002350	4067	LYN	v-yes-1 Yamaguchi sarcoma viral related oncogene homolog	8:56954925	210	339	127	174	125	108	171	99	208
201615_x_at	1.85889	647.18	1.59435	1224.38	AI685060	800	CALD1	caldesmon 1	7:134114710; 7:134226698	671	639	681	467	564	629	560	219	643
208103_s_at	1.85493	245.645	3.69478	815.949	NM_030920	81611	ANP32E	acidic (leucine-rich) nuclear phosphoprotein 32 family, member E	1:-148457478	128	26	75	53	24	82	189	67	31
205778_at	1.85212	370.636	6.35923	386.795	NM_005046	5650	KLK7	kallikrein-related peptidase 7	19:-56171541	36	38	32	14	99	39	27	187	90
210145_at	1.84693	63.1619	2.5326	246.243	M68874	5321	PLA2G4A	phospholipase A2, group IVA (cytosolic, calcium-dependent)	1:185064654	327	83	84	58	109	49	126	47	46
201578_at	1.8336	454.441	1.81748	1938.52	NM_005397	5420	PODXL	podocalyxin-like	7:-130835560	207	290	484	591	655	627	204	263	617
200934_at	1.8311	1166.19	1.94854	3614.83	NM_003472	7913	DEK	DEK oncogene (DNA binding)	6:-18332380	178	183	233	171	310	221	290	208	133
201795_at	1.82368	485.592	2.22647	2560.49	NM_002296	3930	LBR	lamin B receptor	1:-223655827	118	160	115	201	110	182	310	97	104
210845_s_at	1.82282	480.642	1.62712	1437.5	U08839	5329	PLAUR	plasminogen activator, urokinase receptor	19:-48844571; 19:-48842087	286	509	333	604	471	397	599	612	592
208370_s_at	1.81399	537.093	1.98549	1365.28	NM_004414	1827	RCAN1	regulator of calcineurin 1	21:-34810655	399	464	170	200	305	157	405	155	251
212501_at	1.81058	2919.1	1.7372	12422.1	AL564683	1051	CEBPB	CCAAT/enhancer binding protein (C/EBP), beta	20:48240782	324	392	329	248	228	263	259	232	451
221059_s_at	1.80939	730.782	2.61437	2661.29	NM_021615	4166	CHST6	carbohydrate (N-acetylglucosamine 6-O) sulfotransferase 6	16:-74064523	156	166	174	149	166	139	190	49	156
221698_s_at	1.80727	374.105	2.20439	899.283	AF313468	64581	CLEC7A	C-type lectin domain family 7, member A	12:-10160648; 12:-10171189	297	573	225	283	341	193	154	212	98
204675_at	1.80083	274.26	2.57404	1254.04	NM_001047	6715	SRD5A1	steroid-5-alpha-reductase, alpha polypeptide 1 (3-oxo-5 alpha-steroid delta 4-dehydrogenase alpha 1)	5:6686499	655	198	88	177	95	132	25	125	69
218319_at	1.79884	321.789	1.8472	1063.86	NM_020651	57162	PELI1	pellino homolog 1 (Drosophila)	2:-64173499	104	268	181	334	170	274	235	167	201
217028_at	1.79561	932.61	1.57851	3425.42	AJ224869	7852	CXCR4	chemokine (C-X-C motif) receptor 4	2:-136588389	260	615	404	451	480	470	300	213	281
206134_at	1.79233	243.473	1.99554	1000.08	NM_014479	27299	ADAMDEC1	ADAM-like, decysin 1	8:24297915	291	485	50	125	68	65	33	60	51
218236_s_at	1.78956	153.009	1.80552	927.644	NM_005813	23683	PRKD3	protein kinase D3	2:-37331151	158	403	161	235	256	172	169	361	175
203693_s_at	1.78645	375.633	2.21754	913.611	NM_001949	1871	E2F3	E2F transcription factor 3	6:20510376	205	187	203	210	198	195	396	127	178
215034_s_at	1.77903	1243.46	2.92673	3864.67	AI189753	4071	TM4SF1	transmembrane 4 L six family member 1	3:-150569494	34	27	171	129	142	134	309	62	169
213906_at	1.77336	164.862	2.18435	887.302	AW592266	4603	MYBL1	v-myb myeloblastosis viral oncogene homolog (avian)-like 1	8:-67636967	22	18	217	109	63	123	47	41	97
36711_at	1.77331	159.952	1.66927	1199.4	AL021977	23764	MAFF	v-maf musculoaponeurotic fibrosarcoma oncogene homolog F (avian)	22:36927943; 22:36939487	489	327	502	678	615	540	658	460	278
203819_s_at	1.77235	128.865	5.78954	209.376	AU160004	10643	IGF2BP3	insulin-like growth factor 2 mRNA binding protein 3	7:-23316353	24	9	6	17	44	9	1	19	15
204162_at	1.77146	130.766	2.27017	492.694	NM_006101	10403	NDC80	NDC80 homolog, kinetochore complex component (S. cerevisiae)	18:2561604	200	81	110	51	58	131	271	138	35
218847_at	1.77023	257.87	3.44398	599.21	NM_006548	10644	IGF2BP2	insulin-like growth factor 2 mRNA binding protein 2	3:-186844221	111	101	260	326	436	75	227	245	74
202870_s_at	1.75932	426.063	2.55346	1403.25	NM_001255	991	CDC20	cell division cycle 20 homolog (S. cerevisiae)	1:43597212	154	124	60	34	18	57	97	110	64
213260_at	1.75534	420.48	4.1526	899.13	AU145890	2296	FOXC1	forkhead box C1	6:1555679	13	19	23	33	34	32	90	37	32
204750_s_at	1.75482	252.455	3.95903	164.873	BF196457	1824	DSC2	desmocollin 2	18:-26900004	82	313	98	10	19	51	19	66	21
201564_s_at	1.74674	182.737	3.372	533.778	NM_003088	6624	FSCN1	fascin homolog 1, actin-bundling protein (Strongylocentrotus purpuratus)	7:5598979	66	65	157	103	66	206	251	405	170
214240_at	1.7354	184.15	3.10253	368.592	AL556409	51083	GAL	galanin prepropeptide	11:68208558	424	70	69	27	23	92	44	207	73
213456_at	1.73172	176.986	6.44079	491.886	AI927000	25928	SOSTDC1	sclerostin domain containing 1	7:-16467632	3	17	10	31	16	20	675	156	10
203741_s_at	1.72587	151.118	1.52973	493.254	NM_001114	113	ADCY7	adenylate cyclase 7	16:48879323	285	582	396	526	426	428	674	295	267
204198_s_at	1.72586	301.001	2.21778	976.779	AA541630	864	RUNX3	runt-related transcription factor 3	1:-25098589	91	500	87	243	208	78	306	126	252
203625_x_at	1.71987	337.895	2.13785	1384.23	BG105365	6502	SKP2	S-phase kinase-associated protein 2 (p45)	5:36187945	201	133	123	182	156	269	158	200	118
201397_at	1.71891	699.045	2.69013	1728.02	NM_006623	26227	PHGDH	phosphoglycerate dehydrogenase	1:120056032	119	207	49	87	147	63	210	198	148
201579_at	1.71123	521.474	1.67199	2193.22	NM_005245	2195	FAT	FAT tumor suppressor homolog 1 (Drosophila)	4:-187745931	384	432	191	549	302	257	437	271	348
204655_at	1.7073	551.301	2.36633	2734.27	NM_002985	6352	CCL5	chemokine (C-C motif) ligand 5	17:-31222609	549	576	167	318	450	86	113	50	217
203712_at	1.7026	454.45	1.96382	1915.47	NM_014878	9933	KIAA0020	KIAA0020	9:-2794154	322	141	310	196	291	305	270	224	404
203021_at	1.69809	1002.23	3.62167	4964.11	NM_003064	6590	SLPI	secretory leukocyte peptidase inhibitor	20:-43314292	234	662	18	56	35	58	119	80	105
200790_at	1.6931	711.539	1.9176	2255.9	NM_002539	4953	ODC1	ornithine decarboxylase 1	2:-10497958	618	69	147	96	87	174	351	317	186
200629_at	1.69111	690.941	2.10028	3789.41	NM_004184	7453	WARS	tryptophanyl-tRNA synthetase	14:-99869877	493	298	279	560	303	229	168	109	453
201587_s_at	1.69037	2187.2	1.74497	4967.79	NM_001569	3654	IRAK1	interleukin-1 receptor-associated kinase 1	X:-152929150	198	151	377	331	319	398	521	220	354
202307_s_at	1.68348	927.637	2.31786	3020.62	NM_000593	6890	TAP1	transporter 1, ATP-binding cassette, sub-family B (MDR/TAP)	6:-32920964; 6_cox_hap1:-4193841; 6_qbl_hap2:-3999039	266	455	199	325	293	156	75	77	256
219497_s_at	1.68317	270.87	5.11401	854.133	NM_022893	53335	BCL11A	B-cell CLL/lymphoma 11A (zinc finger protein)	2:-60537832; 2:-60531806; 2:-60531805	28	25	4	21	12	5	308	28	12
210512_s_at	1.67675	1241.87	1.8694	2948.85	AF022375	7422	VEGFA	vascular endothelial growth factor A	6:43845930	428	624	410	648	377	670	652	437	320
206245_s_at	1.67636	395.527	1.57808	1556.03	NM_006469	10625	IVNS1ABP	influenza virus NS1A binding protein	1:-183532146	361	357	308	514	362	408	554	553	326
208628_s_at	1.66806	3950	1.66768	13186.9	BC002411	4904	YBX1	Y box binding protein 1	1:42920652	430	323	252	166	191	438	358	310	322
202887_s_at	1.66455	1106.09	1.82197	3663.24	NM_019058	54541	DDIT4	DNA-damage-inducible transcript 4	10:73703682	541	634	423	241	123	297	238	280	397
211967_at	1.66279	1324.97	1.59162	4080.29	BG538627	114908	TMEM123	transmembrane protein 123	11:-101772267	385	593	319	206	308	300	104	391	230
203574_at	1.65858	347.303	1.98355	1236.64	NM_005384	4783	NFIL3	nuclear factor, interleukin 3 regulated	9:-93211149	289	378	106	377	160	178	170	164	130
213122_at	1.65813	519.877	1.97034	2080.5	AI096375	85453	TSPYL5	TSPY-like 5	8:-98354890	105	408	141	259	140	118	651	88	190
202446_s_at	1.65662	670.613	2.04167	3036.86	AI825926	5359	PLSCR1	phospholipid scramblase 1	3:-147715657	148	396	286	278	278	231	292	175	314
207076_s_at	1.65621	864.68	1.74602	2729	NM_000050	445	ASS1	argininosuccinate synthetase 1	9:132309914	595	680	86	152	181	190	89	130	187
200762_at	1.64651	370.589	1.35068	2797.22	NM_001386	1808	DPYSL2	dihydropyrimidinase-like 2	8:26491337	404	276	627	561	679	631	296	538	599
221580_s_at	1.64446	370.886	1.4048	1987.93	BC001972	79101	JOSD3	Josephin domain containing 3	11:-93108747	339	529	399	398	294	400	377	449	301
219209_at	1.64116	328.95	1.816	800.675	NM_022168	64135	IFIH1	interferon induced with helicase C domain 1	2:-162831835	485	548	275	238	378	327	15	216	168
202580_x_at	1.63767	343.598	2.57836	1002.71	NM_021953	2305	FOXM1	forkhead box M1	12:-2837110	55	64	54	25	30	96	607	83	78
211126_s_at	1.63728	245.519	2.07485	954.708	U46006	1466	CSRP2	cysteine and glycine-rich protein 2	12:-75776626	140	272	169	245	266	285	655	162	249
204279_at	1.63263	806.359	1.83344	2378.88	NM_002800	5698	PSMB9	proteasome (prosome, macropain) subunit, beta type, 9 (large multifunctional peptidase 2)	6:32929915; 6_cox_hap1:4202792; 6_qbl_hap2:4007991	366	390	239	396	321	184	59	192	403
221203_s_at	1.63228	223.623	1.72745	905.425	NM_018023	55689	YEATS2	YEATS domain containing 2	3:184898299	282	514	311	500	353	439	583	279	305
201560_at	1.63058	910.077	1.4489	2858.83	NM_013943	25932	CLIC4	chloride intracellular channel 4	1:24944434	508	571	574	439	575	551	395	491	445
212265_at	1.62889	425.978	1.80417	2548.66	AL031781	9444	QKI	quaking homolog, KH domain RNA binding (mouse)	6:163755664	274	413	344	450	557	425	572	289	258
218239_s_at	1.62714	749.082	1.72954	1426.02	NM_012341	23560	GTPBP4	GTP binding protein 4	10:1024348	409	366	436	237	317	362	566	440	224
201721_s_at	1.62326	2545.81	1.3374	5777.14	NM_006762	7805	LAPTM5	lysosomal associated multispanning membrane protein 5	1:-30977902	630	669	527	649	597	524	492	381	654
217728_at	1.62207	2337.71	1.80367	15300.1	NM_014624	6277	S100A6	S100 calcium binding protein A6	1:-151773699	576	635	517	464	374	536	582	559	672
219806_s_at	1.6203	332.451	1.92098	1633.73	NM_020179	56935	C11orf75	chromosome 11 open reading frame 75	11:-92851286	473	567	153	165	185	140	107	102	181
221524_s_at	1.61083	393.143	3.65274	925.44	AF272036	58528	RRAGD	Ras-related GTP binding D	6:-90134312	152	192	219	110	124	138	151	87	54
200757_s_at	1.60656	771.448	1.4895	3333.13	NM_001219	813	CALU	calumenin	7:128166671	492	566	469	484	540	566	593	415	653
218618_s_at	1.60507	384.622	1.82458	1116.39	NM_022763	64778	FNDC3B	fibronectin type III domain containing 3B	3:173241079	363	316	334	471	237	351	385	366	360
203909_at	1.60283	219.409	1.75238	898.317	NM_006359	10479	SLC9A6	solute carrier family 9 (sodium/hydrogen exchanger), member 6	X:134895251	188	180	208	197	248	234	149	210	335
202087_s_at	1.59975	866.107	1.40151	3332.16	NM_001912	1514	CTSL1	cathepsin L1	9:89530793	675	655	632	538	576	639	367	292	472
202413_s_at	1.59917	768.779	1.57422	2860.01	NM_003368	7398	USP1	ubiquitin specific peptidase 1	1:62674970; 1:62674562	222	117	257	242	550	514	297	526	352
210073_at	1.59868	42.71	3.2055	152.773	L32867	6489	ST8SIA1	ST8 alpha-N-acetyl-neuraminide alpha-2,8-sialyltransferase 1	12:-22245201	62	39	51	60	116	45	195	32	24
202499_s_at	1.59797	234.39	1.52573	704.749	NM_006931	6515	SLC2A3	solute carrier family 2 (facilitated glucose transporter), member 3	12:-7963093	253	524	346	677	618	518	633	203	295
201231_s_at	1.59657	2870.93	1.80076	9674.43	NM_001428	2023	ENO1	enolase 1, (alpha)	1:-8843649	517	469	343	353	204	464	233	260	608
208836_at	1.59601	1267.72	1.69162	6046.23	U51478	483	ATP1B3	ATPase, Na+/K+ transporting, beta 3 polypeptide	3:143078159	219	383	367	324	388	424	608	181	413
202207_at	1.59566	392.573	1.76046	1278.05	BG435404	10123	ARL4C	ADP-ribosylation factor-like 4C	2:-235066426	334	628	299	382	351	338	208	297	263
201980_s_at	1.59347	632.77	1.79914	1748	NM_012425	6251	RSU1	Ras suppressor protein 1	10:-16672624	271	506	301	184	251	420	372	341	210
218194_at	1.58971	737.959	1.33444	4106.72	NM_015523	25996	REXO2	REX2, RNA exonuclease 2 homolog (S. cerevisiae)	11:113815386	555	459	400	428	566	530	225	329	534
212730_at	1.58925	476.361	3.14636	2708.48	AK026420	23336	DMN	desmuslin	15:97462808	35	21	63	190	350	36	380	26	164
204557_s_at	1.58251	24.9605	2.18976	108.114	NM_014934	22873	DZIP1	DAZ interacting protein 1	13:-95028457	323	48	324	255	535	339	91	89	56
217714_x_at	1.57847	782.694	1.3488	481.913	AV756729	3925	STMN1	stathmin 1/oncoprotein 18	1:-26099194	495	371	575	518	609	672	517	365	629
203560_at	1.57783	413.403	1.85329	1343.08	NM_003878	8836	GGH	gamma-glutamyl hydrolase (conjugase, folylpolygammaglutamyl hydrolase)	8:-64090196	483	129	113	130	60	180	193	135	66
202951_at	1.56591	434.838	1.71665	1918.53	BE048506	11329	STK38	serine/threonine kinase 38	6:-36569649	217	491	475	435	539	255	389	356	391
201719_s_at	1.56567	374.553	1.54268	1082.4	NM_001431	2037	EPB41L2	erythrocyte membrane protein band 4.1-like 2	6:-131202182	376	128	516	509	289	490	454	235	436
207828_s_at	1.56388	619.039	2.19642	1618.72	NM_005196	1063	CENPF	centromere protein F, 350/400ka (mitosin)	1:212843154	133	85	124	106	85	204	179	190	134
209686_at	1.56344	183.33	5.89036	298.821	BC001766	6285	S100B	S100 calcium binding protein B	21:-46842958	17	15	26	11	41	31	661	42	16
201195_s_at	1.56301	664.064	2.23829	1305.62	AB018009	8140	SLC7A5	solute carrier family 7 (cationic amino acid transporter, y+ system), member 5	16:-86421130	157	314	83	228	55	101	427	116	138
209183_s_at	1.55545	405.235	1.59234	1786.02	AL136653	11067	C10orf10	chromosome 10 open reading frame 10	10:-44791714	302	640	454	472	490	290	580	188	658
210024_s_at	1.55518	679.861	1.68982	1893.7	AB017644	10477	UBE2E3	ubiquitin-conjugating enzyme E2E 3 (UBC4/5 homolog, yeast)	2:181553586; 2:181553356	331	391	166	244	164	382	101	357	127
218877_s_at	1.55419	196.201	1.82121	739.946	NM_021820	60487	TRMT11	tRNA methyltransferase 11 homolog (S. cerevisiae)	6:126349268	224	238	266	365	226	403	346	261	204
218331_s_at	1.55217	400.463	1.50222	1494.07	NM_017782	54906	C10orf18	chromosome 10 open reading frame 18	10:5766806	123	235	603	409	551	481	491	564	402
212397_at	1.55103	355.023	1.43676	1950.77	AL137751	5962	RDX	radixin	11:-109605375	400	364	303	335	447	444	92	450	362
201422_at	1.54968	2561.84	1.53671	6561.22	NM_006332	10437	IFI30	interferon, gamma-inducible protein 30	19:18145578	668	659	374	402	472	441	94	180	521
209034_at	1.54725	743.195	1.48227	1341.53	AF279899	10957	PNRC1	proline-rich nuclear receptor coactivator 1	6:89847215	310	607	363	585	411	462	360	542	331
33323_r_at	1.54689	1676.06	2.03093	5839.27	X57348	2810	SFN	stratifin	1:27062219	192	123	381	459	624	346	623	193	523
213113_s_at	1.54609	494.867	2.02073	1915.03	AI630178	29015	SLC43A3	solute carrier family 43, member 3	11:-56931004	144	218	158	195	396	194	588	111	371
211623_s_at	1.54162	1389.76	1.44903	4657.83	M30448	2091	FBL	fibrillarin	19:-45016937	343	282	407	430	572	463	187	618	604
204962_s_at	1.54076	174.469	2.05761	645	NM_001809	1058	CENPA	centromere protein A	2:26862385; 2:26862386	160	202	79	41	37	162	109	202	55
205006_s_at	1.53803	116.2	1.67075	318.714	NM_004808	9397	NMT2	N-myristoyltransferase 2	10:-15187776	83	201	290	337	433	324	429	511	199
202803_s_at	1.53753	1389.16	1.44581	1757.39	NM_000211	3689	ITGB2	integrin, beta 2 (complement component 3 receptor 3 and 4 subunit)	21:-45130298	498	663	284	601	520	283	495	435	611
212345_s_at	1.53669	735.517	1.6424	2698.32	BE675139	64764	CREB3L2	cAMP responsive element binding protein 3-like 2	7:-137210266	298	597	375	543	382	326	514	388	480
204994_at	1.53464	406.15	1.5121	1240.4	NM_002463	4600	MX2	myxovirus (influenza virus) resistance 2 (mouse)	21:41655819	425	578	430	384	620	364	275	512	522
201968_s_at	1.53394	846.393	1.49703	3071.01	NM_002633	5236	PGM1	phosphoglucomutase 1	1:63831534	515	354	412	527	468	451	549	410	469
203510_at	1.5306	176.608	2.87673	653.073	BG170541	4233	MET	met proto-oncogene (hepatocyte growth factor receptor)	7:116099694	257	143	107	118	152	109	258	36	38
204222_s_at	1.52423	171.896	1.69396	429.51	NM_006851	11010	GLIPR1	GLI pathogenesis-related 1 (glioma)	12:74160779	461	623	552	370	492	527	502	132	207
221185_s_at	1.52399	220.563	2.2992	649.168	NM_025111	84223	IQCG	IQ motif containing G	3:-199100344	57	104	198	119	534	130	68	386	240
200632_s_at	1.52348	1918.74	3.02617	9612.19	NM_006096	10397	NDRG1	N-myc downstream regulated gene 1	8:-134318595	102	176	138	266	76	128	605	65	158
208795_s_at	1.5217	851.729	1.59233	1700.22	D55716	4176	MCM7	minichromosome maintenance complex component 7	7:-99528339	174	347	356	296	458	415	422	399	457
204146_at	1.52048	264.122	1.91611	568.935	BE966146	10635	RAD51AP1	RAD51 associated protein 1	12:4518316	113	63	176	67	104	210	344	243	52
205475_at	1.5169	394.222	7.34268	1554.62	NM_007281	11341	SCRG1	scrapie responsive protein 1	4:-174545874	25	14	47	13	22	28	138	14	102
201897_s_at	1.51534	1002.49	1.727	3476.02	NM_001826	1163	CKS1B	CDC28 protein kinase regulatory subunit 1B	1:153213837	523	193	270	168	199	469	183	314	395
219386_s_at	1.51364	123.415	1.94124	834.816	NM_020125	56833	SLAMF8	SLAM family member 8	1:158063102	440	664	99	369	171	137	286	71	151
202902_s_at	1.51255	938.509	1.73308	1297.22	NM_004079	1520	CTSS	cathepsin S	1:-148969177	611	647	268	203	315	215	214	309	283
213857_s_at	1.51045	1848.79	1.47961	4748.24	BG230614	961	CD47	CD47 molecule	3:-109244630	258	300	500	328	432	374	63	371	351
220147_s_at	1.50785	730.393	1.73668	3113.03	NM_021238	58516	FAM60A	family with sequence similarity 60, member A	12:-31324793	509	518	160	290	264	375	511	363	458
202074_s_at	1.50751	939.496	1.70559	2271.45	NM_021980	10133	OPTN	optineurin	10:13182087	230	340	443	475	504	340	280	230	398
209868_s_at	1.50711	335.388	1.5949	1664.82	D28482	5937	RBMS1	RNA binding motif, single stranded interacting protein 1	2:-160838760	350	385	309	360	324	434	287	433	463
203964_at	1.50608	432.9	1.64904	1995.59	NM_004688	9111	NMI	N-myc (and STAT) interactor	2:-151835230	446	574	282	298	265	392	78	324	227
211367_s_at	1.50453	149.212	1.43445	228.498	U13699	834	CASP1	caspase 1, apoptosis-related cysteine peptidase (interleukin 1, beta, convertase)	11:-104401451	664	516	470	523	503	276	125	372	292
202946_s_at	1.50037	166.559	1.50231	1072.61	NM_014962	22903	BTBD3	BTB (POZ) domain containing 3	20:11846564; 20:11819476	273	311	515	493	653	523	433	626	533
201938_at	1.50032	2607	1.55217	7788.82	NM_004642	8099	CDK2AP1	CDK2-associated protein 1	12:-122311492	438	441	483	271	434	580	243	379	411
206033_s_at	1.50024	155.941	3.29311	331.392	NM_001941	1825	DSC3	desmocollin 3	18:-26824049	8	45	33	55	46	38	65	653	76
205047_s_at	1.49856	270.612	1.78348	1255.27	NM_001673	440	ASNS	asparagine synthetase	7:-97319377; 7:-97319378	197	563	492	270	261	582	463	258	226
206953_s_at	1.498	103.448	1.5702	372.925	NM_012302	23266	LPHN2	latrophilin 2	1:82038669	164	148	353	341	532	390	320	638	291
203358_s_at	1.49771	129.16	1.92617	742.583	NM_004456	2146	EZH2	enhancer of zeste homolog 2 (Drosophila)	7:-148135407	241	458	212	308	165	291	618	191	99
203386_at	1.49723	326.247	1.33795	923.214	AI650848	9882	TBC1D4	TBC1 domain family, member 4	13:-74756809	259	407	601	615	651	545	628	325	467
204748_at	1.4961	82.9862	1.98923	168.956	NM_000963	5743	PTGS2	prostaglandin-endoperoxide synthase 2 (prostaglandin G/H synthase and cyclooxygenase)	1:-184907592	33	229	256	491	286	64	408	58	137
201197_at	1.4949	604.031	2.02938	1420.07	NM_001634	262	AMD1	adenosylmethionine decarboxylase 1	6:111302680; 6:111302679	145	205	185	151	146	144	468	277	147
204023_at	1.49248	366.809	1.88966	1887.73	NM_002916	5984	RFC4	replication factor C (activator 1) 4, 37kDa	3:-187990377	155	254	228	289	364	373	444	253	298
209043_at	1.49207	1081.29	1.81017	4592.73	AF033026	9061	PAPSS1	3'-phosphoadenosine 5'-phosphosulfate synthase 1	4:-108754271	190	158	280	234	345	277	76	424	580
210466_s_at	1.49147	1574.93	1.68743	5017.07	BC002488	26135	SERBP1	SERPINE1 mRNA binding protein 1	1:-67646082	475	350	368	264	435	560	546	294	228
202638_s_at	1.4889	149.723	2.50535	1058.9	NM_000201	3383	ICAM1	intercellular adhesion molecule 1 (CD54), human rhinovirus receptor	19:10242778	176	292	241	595	231	208	478	163	435
218440_at	1.48802	367.591	1.50257	1150.79	NM_020166	56922	MCCC1	methylcrotonoyl-Coenzyme A carboxylase 1 (alpha)	3:-184215701	317	530	318	525	335	435	421	332	420
205668_at	1.48525	160.261	1.74567	758.392	NM_002349	4065	LY75	lymphocyte antigen 75	2:-160368113	177	388	194	489	390	150	215	218	243
44790_s_at	1.48524	96.1082	1.76029	212.619	AI129310	80183	C13orf18	chromosome 13 open reading frame 18	13:-45814137	142	475	215	572	357	244	156	195	117
203038_at	1.48156	697.7	1.55278	4711.51	NM_002844	5796	PTPRK	protein tyrosine phosphatase, receptor type, K	6:-128331624	338	561	278	497	594	369	140	315	384
49306_at	1.47909	190.004	1.61434	293.043	AI890191	83937	RASSF4	Ras association (RalGDS/AF-6) domain family member 4	10:44775224	390	503	462	375	210	197	70	214	357
203315_at	1.47898	647.047	1.56342	1906.98	BC000103	8440	NCK2	NCK adaptor protein 2	2:105727785; 2:105834736	432	421	395	388	397	413	451	427	583
204086_at	1.47798	219.584	2.43228	585.024	NM_006115	23532	PRAME	preferentially expressed antigen in melanoma	22:-21220123	81	20	46	69	5	30	50	70	92
204537_s_at	1.47736	261.453	2.07589	358.559	NM_004961	2564	GABRE	gamma-aminobutyric acid (GABA) A receptor, epsilon	X:-150872251	195	348	57	321	33	102	16	302	180
205480_s_at	1.47666	1328.27	1.42152	4087.58	NM_006759	7360	UGP2	UDP-glucose pyrophosphorylase 2	2:63922517; 2:63921601	596	442	460	356	559	573	288	605	423
204437_s_at	1.47622	294.236	2.81258	792.514	NM_016725	2348	FOLR1	folate receptor 1 (adult)	11:71578387; 11:71578249; 11:71580820; 11:71578905; 11:71580855; 11:71578606	77	75	53	179	134	35	141	90	279
209835_x_at	1.47579	637.58	1.59234	2643.17	BC004372	960	CD44	CD44 molecule (Indian blood group)	11:35116992	238	352	426	453	406	343	231	358	631
200983_x_at	1.47542	2331.83	1.54434	7850.37	BF983379	966	CD59	CD59 molecule, complement regulatory protein	11:-33681133	236	368	358	446	530	387	373	585	655
200872_at	1.4754	3716.99	1.58699	9931.87	NM_002966	6281	S100A10	S100 calcium binding protein A10	1:-150222010	552	666	506	473	441	492	662	478	485
212330_at	1.47533	504.859	1.74401	1888.67	R60866	7027	TFDP1	transcription factor Dp-1	13:113287056	206	247	439	429	486	565	581	550	489
201819_at	1.47309	522.494	1.43834	768.5	NM_005505	949	SCARB1	scavenger receptor class B, member 1	12:-123828126	232	135	614	564	418	489	512	508	671
201407_s_at	1.47276	365.999	1.65186	1036.5	AI186712	5500	PPP1CB	protein phosphatase 1, catalytic subunit, beta isoform	2:28828129; 2:28828117	478	428	489	413	392	347	565	392	211
221854_at	1.47225	243.456	9.7507	633.1	AI378979	5317	PKP1	plakophilin 1 (ectodermal dysplasia/skin fragility syndrome)	1:199519202	4	51	3	2	4	14	48	15	7
218542_at	1.46674	143.345	1.91176	630.108	NM_018131	55165	CEP55	centrosomal protein 55kDa	10:95246398	173	346	136	72	83	129	473	185	87
210873_x_at	1.46673	158.982	1.94672	244.329	U03891	200315	APOBEC3A	apolipoprotein B mRNA editing enzyme, catalytic polypeptide-like 3A	22:37683568	371	543	193	170	158	149	49	113	83
218027_at	1.4658	715.917	1.42016	2697.14	NM_014175	29088	MRPL15	mitochondrial ribosomal protein L15	8:55210333	602	214	414	205	275	426	370	402	448
214581_x_at	1.46517	129.711	1.87404	236.757	BE568134	27242	TNFRSF21	tumor necrosis factor receptor superfamily, member 21	6:-47307227	251	258	151	122	155	152	88	377	149
212371_at	1.46457	492.767	1.44384	2472.29	AL049397	51029	FAM152A	family with sequence similarity 152, member A	1:242882974	427	330	422	309	273	422	318	482	421
201063_at	1.46398	679.148	1.50913	2433.51	NM_002901	5954	RCN1	reticulocalbin 1, EF-hand calcium binding domain	11:32069266	470	554	664	575	587	520	354	304	493
201739_at	1.46243	506.044	1.46085	2664.29	NM_005627	6446	SGK1	serum/glucocorticoid regulated kinase 1	6:-134532081	451	619	409	673	370	626	670	411	511
213975_s_at	1.46197	3168.12	1.50318	4837.89	AV711904	84197	FLJ23356	hypothetical protein FLJ23356	8:43067817	543	610	221	307	440	185	122	165	121
218084_x_at	1.46189	869.763	1.92967	2996.51	NM_014164	53827	FXYD5	FXYD domain containing ion transport regulator 5	19:40337466	264	275	444	420	359	479	406	283	647
202933_s_at	1.45782	622.063	1.58556	1404	NM_005433	7525	YES1	v-yes-1 Yamaguchi sarcoma viral oncogene homolog 1	18:-711593	442	431	298	231	334	356	368	596	153
213923_at	1.45776	991.947	1.57035	1822.94	AW005535	5912	RAP2B	RAP2B, member of RAS oncogene family	3:154362718	378	499	495	424	596	378	479	322	376
207714_s_at	1.4567	584.602	1.63487	2760.52	NM_004353	871	SERPINH1	serpin peptidase inhibitor, clade H (heat shock protein 47), member 1, (collagen binding protein 1)	11:74950817	564	587	592	537	224	600	542	443	669
211063_s_at	1.45664	453.412	1.79779	1219.57	BC006403	4690	NCK1	NCK adaptor protein 1	3:138063762	265	159	424	306	481	279	73	211	232
217456_x_at	1.45647	688.615	1.36363	4229.82	M31183	3133	HLA-E	major histocompatibility complex, class I, E	6:30565249; 6_cox_hap1:1905841; 6_qbl_hap2:1704132	497	633	669	620	660	618	194	330	642
201923_at	1.45495	1088.41	1.44188	4777.17	NM_006406	10549	PRDX4	peroxiredoxin 4	X:23595565	574	448	364	305	367	466	336	469	426
213582_at	1.45395	49.6462	2.01449	105.854	BF439472	23250	ATP11A	ATPase, class VI, type 11A	13:112392643	189	333	291	578	402	577	680	333	101
205173_x_at	1.45334	241.925	1.29296	924.422	NM_001779	965	CD58	CD58 molecule	1:-116858679	650	540	479	455	430	605	484	613	430
210785_s_at	1.45282	191.628	1.82665	643.216	AB035482	9473	C1orf38	chromosome 1 open reading frame 38	1:28071641	303	551	251	412	268	199	508	194	486
222242_s_at	1.45234	405.004	3.80383	868.467	AF243527	25818	KLK5	kallikrein-related peptidase 5	19:-56138372	26	34	40	35	133	66	8	107	131
201200_at	1.4519	1019.05	1.21671	3139.27	NM_003851	8804	CREG1	cellular repressor of E1A-stimulated genes 1	1:-165776876	488	502	579	643	645	664	369	668	506
213262_at	1.45177	101.066	1.67221	341.681	AI932370	26278	SACS	spastic ataxia of Charlevoix-Saguenay (sacsin)	13:-22800966	280	452	391	410	528	325	631	472	192
219974_x_at	1.44854	234.962	1.48747	514.108	NM_018479	55862	ECHDC1	enoyl Coenzyme A hydratase domain containing 1	6:-127651551	496	162	249	319	339	342	160	570	318
206715_at	1.44676	63.2031	1.44146	349.932	NM_012252	22797	TFEC	transcription factor EC	7:-115362437	633	637	365	374	387	268	83	384	261
201976_s_at	1.44647	383.489	1.98406	1795.94	NM_012334	4651	MYO10	myosin X	5:-16715015	621	581	90	300	148	253	268	368	200
218984_at	1.44452	263.898	1.42474	1327.21	NM_019042	54517	PUS7	pseudouridylate synthase 7 homolog (S. cerevisiae)	7:-104884197	215	295	408	352	443	447	476	650	414
203287_at	1.44285	413.152	1.96539	1054.5	NM_005558	3898	LAD1	ladinin 1	1:-199616588	676	651	96	120	400	164	539	308	440
200052_s_at	1.44095	822.165	1.66805	3275.69	NM_004515	3608	ILF2	interleukin enhancer binding factor 2, 45kDa	1:-151901138	462	203	382	351	283	525	120	576	572
219646_at	1.43904	279.66	1.53588	411.243	NM_017702	54849	DEF8	differentially expressed in FDCP 8 homolog (mouse)	16:88542651; 16:88542683	469	219	464	393	108	247	217	678	372
202200_s_at	1.43781	560.166	1.70264	1658.95	NM_003137	6732	SRPK1	SFRS protein kinase 1	6:-35908789	356	273	242	225	366	323	364	274	225
202052_s_at	1.43693	278.017	1.45704	1035.69	NM_015577	26064	RAI14	retinoic acid induced 14	5:34692274	383	153	594	628	635	504	635	598	498
205393_s_at	1.43617	96.6635	1.67065	128.814	NM_001274	1111	CHEK1	CHK1 checkpoint homolog (S. pombe)	11:125001546	125	287	135	100	106	275	202	339	85
202897_at	1.43614	217.534	1.59788	831.61	AB023430	140885	SIRPA	signal-regulatory protein alpha	20:1823424; 20:1822812; 20:1823825	474	401	345	498	466	304	640	287	399
203120_at	1.43567	378.848	2.00991	952.159	NM_005426	7159	TP53BP2	tumor protein p53 binding protein, 2	1:-222034218	95	119	143	361	222	239	345	205	265
202613_at	1.43452	200.456	1.72369	985.838	NM_001905	1503	CTPS	CTP synthase	1:41217593	337	150	159	291	127	200	455	320	268
209337_at	1.43294	425.12	1.49061	1423.58	AF063020	11168	PSIP1	PC4 and SFRS1 interacting protein 1	9:-15454065; 9:-15460643	121	58	450	322	548	309	35	412	324
221261_x_at	1.43213	266.411	2.22554	656.237	NM_030801	81557	MAGED4B	melanoma antigen family D, 4B	X:51944658	127	216	474	552	253	292	592	518	212
203637_s_at	1.43103	159.074	2.18459	443.024	NM_000381	4281	MID1	midline 1 (Opitz/BBB syndrome)	X:-10373595	74	109	56	66	141	47	191	63	33
217975_at	1.42996	814.881	1.32918	2338.51	NM_016303	51186	WBP5	WW domain binding protein 5	X:102498035	540	643	651	618	652	617	435	408	478
202760_s_at	1.42885	144.679	1.4334	368.065	NM_007203	445815	PALM2-AKAP2	PALM2-AKAP2	9:111582409; 9:111582397	653	310	528	510	498	313	620	334	365
204203_at	1.42539	177.172	1.86278	756.171	NM_001806	1054	CEBPG	CCAAT/enhancer binding protein (C/EBP), gamma	19:38556448	250	210	277	176	232	354	350	522	231
201305_x_at	1.42466	1658.56	1.3901	2791.58	AV712577	10541	ANP32B	acidic (leucine-rich) nuclear phosphoprotein 32 family, member B	9:99785309	522	482	544	487	487	591	450	583	437
200821_at	1.42455	509.844	1.47564	1427.32	NM_013995	3920	LAMP2	lysosomal-associated membrane protein 2	X:-119448708; X:-119454392	262	262	666	551	664	571	574	607	340
210136_at	1.42342	317.707	1.8716	805.056	AW070431	4155	MBP	myelin basic protein	18:-72819777; 18:-72853726	369	186	640	364	398	302	93	148	499
204030_s_at	1.42304	276.378	2.22414	799.268	NM_014575	29970	SCHIP1	schwannomin interacting protein 1	3:160474237	73	54	196	252	422	223	57	395	219
218603_at	1.42234	612.187	1.44453	2170.56	NM_016217	51696	HECA	headcase homolog (Drosophila)	6:139497941	533	605	447	520	602	602	137	264	497
204319_s_at	1.42147	880.291	1.53722	2274.18	NM_002925	6001	RGS10	regulator of G-protein signaling 10	10:-121249329	587	471	582	366	578	557	130	565	559
217867_x_at	1.41999	539.072	1.75727	2463.44	NM_012105	25825	BACE2	beta-site APP-cleaving enzyme 2	21:41461597	550	568	340	185	246	357	56	222	460
201774_s_at	1.41875	253.562	1.47702	532.632	AK022511	9918	NCAPD2	non-SMC condensin I complex, subunit D2	12:6473557	179	127	297	333	223	242	648	609	346
221676_s_at	1.41644	599.229	1.52502	1458.99	BC002342	23603	CORO1C	coronin, actin binding protein, 1C	12:-107563017; 12:-107565307	579	504	295	301	446	335	319	305	293
201970_s_at	1.41399	594.913	1.57418	1633.79	NM_002482	4678	NASP	nuclear autoantigenic sperm protein (histone-binding)	1:45822303	312	342	392	414	332	383	419	328	339
205347_s_at	1.41396	388.723	3.62948	1479.77	NM_021992	11013	TMSL8	thymosin-like 8	X:-101655266	162	531	42	29	50	79	38	38	41
205122_at	1.41331	52.1847	1.73426	120.308	BF439316	8577	TMEFF1	transmembrane protein with EGF-like and two follistatin-like domains 1	9:102275537	261	337	207	128	169	475	164	625	70
202107_s_at	1.41326	515.172	1.79289	1998.25	NM_004526	4171	MCM2	minichromosome maintenance complex component 2	3:128799942	100	72	238	223	211	224	347	247	373
213010_at	1.41243	296.675	1.47204	787.621	AI088622	112464	PRKCDBP	protein kinase C, delta binding protein	11:-6296753	545	621	639	387	659	636	392	523	574
219148_at	1.41058	179.504	1.56665	573.57	NM_018492	55872	PBK	PDZ binding kinase	8:-27723058	137	60	200	135	102	249	128	645	165
204613_at	1.41057	452.634	1.94806	928.359	NM_002661	5336	PLCG2	phospholipase C, gamma 2 (phosphatidylinositol-specific)	16:80370430	166	244	134	423	172	70	52	158	197
202466_at	1.41037	481.904	1.36077	2194.35	NM_006999	11044	POLS	polymerase (DNA directed) sigma	5:6767717	487	417	498	655	568	512	333	463	612
209990_s_at	1.40889	100.325	4.30505	292.367	AF056085	9568	GABBR2	gamma-aminobutyric acid (GABA) B receptor, 2	9:-100090186	94	376	19	22	521	22	64	39	43
209155_s_at	1.40868	285.912	1.45039	752.073	BC001595	22978	NT5C2	5'-nucleotidase, cytosolic II	10:-104837903	617	539	573	482	569	491	534	534	184
218018_at	1.40853	629.457	1.48787	1460.83	AW449022	8566	PDXK	pyridoxal (pyridoxine, vitamin B6) kinase	21:43963405	663	289	389	371	529	556	96	409	537
206074_s_at	1.40631	417.855	2.03803	1664.65	NM_002131	3159	HMGA1	high mobility group AT-hook 1	6:34312627; 6:34312906; 6:34313373; 6:34314545	514	259	236	173	176	211	329	267	312
205967_at	1.40603	2569.12	1.57695	2290.93	NM_003542	8364	HIST1H4C	histone cluster 1, H4c	6:26212154	353	336	609	260	428	501	340	459	524
208941_s_at	1.4058	472.274	1.65915	875.856	BC000941	22929	SEPHS1	selenophosphate synthetase 1	10:-13400088	306	460	383	158	260	454	311	458	276
216237_s_at	1.40513	504.8	2.05348	1256.3	AA807529	4174	MCM5	minichromosome maintenance complex component 5	22:34126115	220	248	179	188	201	192	328	137	260
204702_s_at	1.40357	203.895	2.18387	509.289	NM_004289	9603	NFE2L3	nuclear factor (erythroid-derived 2)-like 3	7:26158384	64	126	184	111	162	166	85	82	111
200916_at	1.40328	2362.79	1.61237	7535.08	NM_003564	8407	TAGLN2	transgelin 2	1:-158154526	566	558	602	315	347	615	399	580	673
207668_x_at	1.40179	1322.37	1.65993	5937.31	NM_005742	10130	PDIA6	protein disulfide isomerase family A, member 6	2:-10840969	572	353	425	277	230	405	448	417	462
212110_at	1.39941	347.845	1.62064	1853.14	D31887	23516	SLC39A14	solute carrier family 39 (zinc transporter), member 14	8:22280736	209	100	490	558	363	510	677	496	512
60474_at	1.3993	101.858	3.98513	268.29	AA469071	55612	FERMT1	fermitin family homolog 1 (Drosophila)	20:-6003492	53	28	21	40	38	60	163	121	34
204900_x_at	1.39818	226.095	1.47643	881.508	NM_003864	8819	SAP30	Sin3A-associated protein, 30kDa	4:174528667	410	223	427	175	316	611	103	501	290
205569_at	1.39794	233.4	3.58821	999.53	NM_014398	27074	LAMP3	lysosomal-associated membrane protein 3	3:-184322696	93	163	38	65	90	33	14	24	39
203408_s_at	1.39786	390.045	1.4851	1016.5	NM_002971	6304	SATB1	SATB homeobox 1	3:-18364438	208	373	507	567	511	311	133	551	418
211042_x_at	1.39759	472.161	1.95756	1388.8	BC006329	4162	MCAM	melanoma cell adhesion molecule	11:-118684444	269	206	168	211	376	246	264	153	236
203234_at	1.39713	162.71	2.21599	357.74	NM_003364	7378	UPP1	uridine phosphorylase 1	7:48094879; 7:48095270	604	492	223	442	82	226	425	151	65
213523_at	1.3949	231.236	2.75867	690.486	AI671049	898	CCNE1	cyclin E1	19:34994740; 19:34995400	134	88	70	43	36	100	299	86	59
201433_s_at	1.39462	773.259	1.46567	3699.15	NM_014754	9791	PTDSS1	phosphatidylserine synthase 1	8:97343342	610	257	357	355	274	535	386	351	502
203780_at	1.39308	111.922	1.96773	387.573	AF275945	10205	MPZL2	myelin protein zero-like 2	11:-117629344; 11:-117632839	247	577	190	192	203	161	176	360	89
209511_at	1.39303	439.802	1.47519	1477.67	BC003582	5435	POLR2F	polymerase (RNA) II (DNA directed) polypeptide F	22:36679663	634	508	589	323	459	559	459	546	556
211529_x_at	1.3923	3349.47	1.54263	11840.2	M90684	3135	HLA-G	major histocompatibility complex, class I, G	6:29903496	467	505	531	588	497	433	86	345	678
218662_s_at	1.38983	115.247	1.57513	572.03	NM_022346	64151	NCAPG	non-SMC condensin I complex, subunit G	4:17421622	457	315	262	224	163	271	312	166	145
212314_at	1.38918	321.858	2.0324	1354	AB018289	23231	KIAA0746	KIAA0746 protein	4:-25358146	561	613	116	303	139	99	470	101	129
201697_s_at	1.38826	622.037	1.37581	1753.25	NM_001379	1786	DNMT1	DNA (cytosine-5-)-methyltransferase 1	19:-10105022	386	435	518	583	582	476	591	572	586
209373_at	1.38816	343.229	2.25926	696.775	BC003179	7851	MALL	mal, T-cell differentiation protein-like	2:-110198743	246	648	182	186	190	133	594	364	215
218755_at	1.388	275.229	1.5445	761.378	NM_005733	10112	KIF20A	kinesin family member 20A	5:137543247	354	308	224	85	114	262	105	493	325
202690_s_at	1.38657	922.129	1.37374	2063.7	BC001721	6632	SNRPD1	small nuclear ribonucleoprotein D1 polypeptide 16kDa	18:17446257	433	332	457	400	454	513	330	560	394
213457_at	1.38634	163.387	1.7915	370.954	BF739959	9258	MFHAS1	malignant fibrous histiocytoma amplified sequence 1	8:-8679408	294	271	379	221	236	350	559	507	237
217996_at	1.38606	165.352	2.05774	827.638	AA576961	22822	PHLDA1	pleckstrin homology-like domain, family A, member 1	12:-74705494	86	137	401	348	393	372	523	298	289
219740_at	1.38437	129.614	1.97644	154.141	NM_024749	79805	VASH2	vasohibin 2	1:211190599	106	43	230	108	484	107	58	492	84
209397_at	1.38172	544.035	1.51213	1509.63	BC000147	4200	ME2	malic enzyme 2, NAD(+)-dependent, mitochondrial	18:46659432	351	165	328	281	235	494	110	299	316
200859_x_at	1.38086	821.319	1.6404	3334.03	NM_001456	2316	FLNA	filamin A, alpha (actin binding protein 280)	X:-153230090	149	481	652	671	607	482	676	400	675
205098_at	1.37879	392.073	1.49528	855.317	AI421071	1230	CCR1	chemokine (C-C motif) receptor 1	3:-46218203	397	583	267	492	419	218	216	311	358
216033_s_at	1.37859	177.517	1.57299	442.681	S74774	2534	FYN	FYN oncogene related to SRC, FGR, YES	6:-112089179; 6:-112089186	407	601	402	490	372	282	436	573	416
218723_s_at	1.37779	373.129	1.46462	1495.68	NM_014059	28984	C13orf15	chromosome 13 open reading frame 15	13:40929541	295	653	559	559	636	659	234	506	557
202644_s_at	1.37772	451.695	1.96323	2219.07	NM_006290	7128	TNFAIP3	tumor necrosis factor, alpha-induced protein 3	6:138230273	281	473	243	540	242	266	637	140	409
221538_s_at	1.37729	286.07	1.65676	1012.62	AL136663	5361	PLXNA1	plexin A1	3:128190191	326	497	658	653	517	576	678	461	542
204060_s_at	1.37693	248.117	2.19477	918.221	NM_005044	5613	PRKX	protein kinase, X-linked	X:-3532410	131	209	131	145	207	62	526	139	223
200039_s_at	1.37643	1036.77	1.52177	4841.4	NM_002794	5690	PSMB2	proteasome (prosome, macropain) subunit, beta type, 2	1:-35841326	539	324	432	488	386	449	387	394	526
202705_at	1.37598	471.519	1.80535	1281.1	NM_004701	9133	CCNB2	cyclin B2	15:57184611	342	181	119	57	39	228	186	273	110
219225_at	1.37479	263.923	6.90973	784.651	NM_024554	79605	PGBD5	piggyBac transposable element derived 5	1:-228524015	37	125	74	36	7	34	13	34	28
202233_s_at	1.3745	1597.48	1.36699	8306.98	NM_006004	7388	UQCRH	ubiquinol-cytochrome c reductase hinge protein	1:46541966	513	488	336	313	323	517	315	407	456
203632_s_at	1.37345	327.389	2.39566	1415.07	NM_016235	51704	GPRC5B	G protein-coupled receptor, family C, group 5, member B	16:-19777795	88	134	78	91	157	141	34	78	172
204872_at	1.37295	105.872	1.57557	543.737	NM_007005	7091	TLE4	transducin-like enhancer of split 4 (E(sp1) homolog, Drosophila)	9:81376697	212	110	273	666	518	286	245	184	250
211725_s_at	1.37139	297.668	1.34559	812.617	BC005884	637	BID	BH3 interacting domain death agonist	22:-16596905	662	549	481	274	329	256	314	528	441
201725_at	1.37131	590.575	1.57987	2419.63	NM_006023	8872	CDC123	cell division cycle 123 homolog (S. cerevisiae)	10:12277970	542	312	349	207	276	552	375	475	433
209781_s_at	1.37063	288.302	2.56114	720.648	AF069681	10656	KHDRBS3	KH domain containing, RNA binding, signal transduction associated 3	8:136538897	47	106	244	208	344	287	650	385	179
202185_at	1.36988	732.737	1.54314	1804.69	NM_001084	8985	PLOD3	procollagen-lysine, 2-oxoglutarate 5-dioxygenase 3	7:-100635978	221	277	452	503	423	548	638	500	634
222158_s_at	1.36947	477.213	1.69035	965.737	AF229834	51029	FAM152A	family with sequence similarity 152, member A	1:242882974	647	426	631	240	174	332	269	278	412
201064_s_at	1.36748	851.181	1.36358	2447.97	NM_003819	8761	PABPC4	poly(A) binding protein, cytoplasmic 4 (inducible form)	1:-39799074	616	572	638	654	449	567	643	622	625
214051_at	1.36543	291.952	2.44438	1028.74	BF677486	286527	MGC39900	thymosin beta15b	:	115	359	137	61	270	155	36	95	95
209272_at	1.3651	368.884	1.46465	1092.15	AF045451	4664	NAB1	NGFI-A binding protein 1 (EGR1 binding protein 1)	2:191222092	216	161	415	597	533	541	226	389	477
200958_s_at	1.36478	1758.4	1.26287	5549.58	NM_005625	6386	SDCBP	syndecan binding protein (syntenin)	8:59628281	592	606	661	652	627	661	555	335	561
212724_at	1.36344	452.862	1.4802	2514.37	BG054844	390	RND3	Rho family GTPase 3	2:-151032954	405	515	398	419	614	273	339	347	471
218217_at	1.36324	428.098	1.50849	2339.84	NM_021626	59342	SCPEP1	serine carboxypeptidase 1	17:52410487	615	541	314	479	408	321	124	237	442
203211_s_at	1.36307	220.054	1.59961	656.981	AK027038	8898	MTMR2	myotubularin related protein 2	11:-95205693	248	382	288	219	277	417	211	432	143
209683_at	1.36117	88.6903	1.6357	221.757	AA243659	81553	FAM49A	family with sequence similarity 49, member A	2:-16597381	501	617	371	445	331	95	98	238	253
201479_at	1.36103	681.02	1.49719	3629.95	NM_001363	1736	DKC1	dyskeratosis congenita 1, dyskerin	X:153644343	368	261	429	483	453	468	527	490	529
203828_s_at	1.36103	622.133	3.22127	1187.27	NM_004221	9235	IL32	interleukin 32	16:3055313; 16:3055785; 16:3055612; 16:3055639; 16:3055663	107	90	139	218	43	56	660	23	108
218684_at	1.35965	532.96	1.5346	1502.45	NM_018103	55144	LRRC8D	leucine rich repeat containing 8 family, member D	1:90060100	377	284	369	251	541	485	224	505	531
218738_s_at	1.3594	307.091	1.38933	1412.74	NM_016271	51444	RNF138	ring finger protein 138	18:27925834; 18:27926644	237	191	525	434	537	497	248	545	464
204781_s_at	1.35863	106.331	1.4603	565.783	NM_000043	355	FAS	Fas (TNF receptor superfamily, member 6)	10:90740267	476	398	384	623	476	361	443	262	473
220239_at	1.35767	129.01	2.37193	470.405	NM_018846	55975	KLHL7	kelch-like 7 (Drosophila)	7:23111952; 7:23111926	186	195	140	104	81	160	72	106	86
208694_at	1.35743	223.723	1.41054	1230.21	U47077	5591	PRKDC	protein kinase, DNA-activated, catalytic polypeptide	8:-48848222; 8:-48848221	373	139	633	584	483	474	653	547	532
202501_at	1.35712	397.073	1.62002	1126.9	NM_014268	10982	MAPRE2	microtubule-associated protein, RP/EB family, member 2	18:30875388	348	525	305	403	338	416	498	382	439
220617_s_at	1.35425	487.718	1.82659	1272.35	NM_018181	55205	ZNF532	zinc finger protein 532	18:54681040	349	477	352	661	590	477	366	172	590
200839_s_at	1.35347	3507.11	1.25272	12255.2	NM_001908	1508	CTSB	cathepsin B	8:-11737444	648	652	646	642	622	666	557	367	660
214700_x_at	1.35301	123.737	1.44599	227.2	AK000323	55183	RIF1	RAP1 interacting factor homolog (yeast)	2:151974673	388	274	487	359	439	467	272	634	182
202727_s_at	1.35292	719.142	1.22943	3175.28	NM_000416	3459	IFNGR1	interferon gamma receptor 1	6:-137560314	673	658	519	630	611	623	538	494	539
200840_at	1.3529	1618.77	1.41692	7205.7	NM_005548	3735	KARS	lysyl-tRNA synthetase	16:-74219131	583	424	620	461	585	619	255	318	474
217901_at	1.35281	749.289	1.62704	2961.36	BF031829	1829	DSG2	desmoglein 2	18:27332169	87	121	406	522	495	531	409	555	603
201177_s_at	1.35205	1033.43	1.31315	1664.76	NM_005499	10054	UBA2	ubiquitin-like modifier activating enzyme 2	19:39611107	362	168	654	432	621	603	197	675	386
217744_s_at	1.35065	641.288	1.53729	1370.24	NM_022121	64065	PERP	PERP, TP53 apoptosis effector	6:-138453618	554	679	205	202	213	515	348	667	333
204159_at	1.34904	230.943	1.45032	500.854	NM_001262	1031	CDKN2C	cyclin-dependent kinase inhibitor 2C (p18, inhibits CDK4)	1:51206954; 1:51208229	72	98	313	433	494	293	278	466	241
221652_s_at	1.3479	285.347	1.42957	736.033	AF274950	55726	C12orf11	chromosome 12 open reading frame 11	12:-26949378	255	260	558	344	427	443	474	489	259
212144_at	1.34609	610.386	1.44431	1143.73	AL021707	25777	UNC84B	unc-84 homolog B (C. elegans)	22:-37460680	571	625	569	587	570	418	550	438	637
207469_s_at	1.34329	101.822	1.64159	392.987	NM_003662	8544	PIR	pirin (iron-binding nuclear protein)	X:-15312846	357	94	300	183	212	201	117	250	125
203554_x_at	1.34205	847.435	1.64774	3116.82	NM_004219	9232	PTTG1	pituitary tumor-transforming 1	5:159781442	391	380	154	147	105	209	127	319	274
218829_s_at	1.3383	171.781	1.43678	764.19	NM_017780	55636	CHD7	chromodomain helicase DNA binding protein 7	8:61753892	669	237	494	481	306	555	401	327	562
221922_at	1.33719	305.943	1.89259	740.883	AW195581	29899	GPSM2	G-protein signaling modulator 2 (AGS3-like, C. elegans)	1:109221349	141	230	326	198	297	235	622	456	195
205585_at	1.33666	141.335	1.74218	284.216	NM_001987	2120	ETV6	ets variant gene 6 (TEL oncogene)	12:11694054	191	178	468	312	326	280	298	255	369
209421_at	1.33384	160.176	1.27174	566.34	U04045	4436	MSH2	mutS homolog 2, colon cancer, nonpolyposis type 1 (E. coli)	2:47483766	360	164	348	199	311	436	219	681	425
204924_at	1.33356	289.794	1.51973	631.149	NM_003264	7097	TLR2	toll-like receptor 2	4:154824890	622	430	197	399	389	355	180	288	216
31845_at	1.33341	247.015	1.76331	729.051	U32645	2000	ELF4	E74-like factor 4 (ets domain transcription factor)	X:-129026585	239	280	568	603	473	471	493	296	379
203336_s_at	1.33312	268.887	1.24946	1216.2	AL548363	9270	ITGB1BP1	integrin beta 1 binding protein 1	2:-9463273	636	309	656	545	592	658	544	676	555
221875_x_at	1.33291	5081.11	1.58801	11749.9	AW514210	3134	HLA-F	major histocompatibility complex, class I, F	6_qbl_hap2:945922; 6_cox_hap1:1143812; 6:29799095	455	584	535	478	478	337	134	199	656
208959_s_at	1.3326	563.513	1.28069	2322.49	BC005374	23071	TXNDC4	thioredoxin domain containing 4 (endoplasmic reticulum)	9:-101781285	665	667	536	636	577	620	254	426	547
204992_s_at	1.33183	1119.7	1.68944	5202.94	NM_002628	5217	PFN2	profilin 2	3:-151165380	146	47	465	496	407	345	362	183	565
209568_s_at	1.33061	293.372	1.28979	1267.04	AF186779	23179	RGL1	ral guanine nucleotide dissociation stimulator-like 1	1:181871830	661	586	580	672	667	442	414	502	606
204401_at	1.33027	367.802	3.43021	1328.49	NM_002250	3783	KCNN4	potassium intermediate/small conductance calcium-activated channel, subfamily N, member 4	19:-48962526	63	239	39	79	77	72	17	69	135
201152_s_at	1.32973	584.884	1.40531	2077.21	N31913	4154	MBNL1	muscleblind-like (Drosophila)	3:153499883; 3:153468518	494	546	655	524	630	402	447	457	633
218096_at	1.32966	350.609	1.21735	877.314	NM_018361	55326	AGPAT5	1-acylglycerol-3-phosphate O-acyltransferase 5 (lysophosphatidic acid acyltransferase, epsilon)	8:6553285	240	155	593	562	448	561	485	672	549
202370_s_at	1.32929	552.715	1.33758	2922	NM_001755	865	CBFB	core-binding factor, beta subunit	16:65620550	507	370	482	534	502	592	489	624	623
213154_s_at	1.32729	141.801	1.30648	845.541	AI934125	23299	BICD2	bicaudal D homolog 2 (Drosophila)	9:-94513466	588	580	637	624	613	553	537	651	571
208018_s_at	1.32712	299.043	1.58608	621.708	NM_002110	3055	HCK	hemopoietic cell kinase	20:30103717	502	616	254	502	375	316	77	350	454
214431_at	1.32677	471.823	1.96499	1913.65	NM_003875	8833	GMPS	guanine monphosphate synthetase	3:157071018	278	240	293	236	296	432	279	108	247
204033_at	1.32638	321.76	1.83448	1271.22	NM_004237	9319	TRIP13	thyroid hormone receptor interactor 13	5:946003	448	114	122	144	91	225	178	352	254
219257_s_at	1.32608	399.669	2.01113	1202.24	NM_021972	8877	SPHK1	sphingosine kinase 1	17:71892296; 17:71892325	284	145	316	469	348	421	568	291	540
209024_s_at	1.32575	640.364	1.76374	2658.51	AI472757	10492	SYNCRIP	synaptotagmin binding, cytoplasmic RNA interacting protein	6:-86380657	635	434	542	191	272	341	536	346	449
203491_s_at	1.32563	114.025	1.66614	295.814	AI123527	9702	CEP57	centrosomal protein 57kDa	11:95163289	580	496	657	299	438	563	157	303	297
208885_at	1.32466	683.16	1.49297	1150.15	J02923	3936	LCP1	lymphocyte cytosolic protein 1 (L-plastin)	13:-45598059	365	552	338	394	445	170	458	359	481
207254_at	1.32399	66.8721	3.15508	93.7667	NM_005073	6564	SLC15A1	solute carrier family 15 (oligopeptide transporter), member 1	13:-98134056	395	585	125	193	307	115	343	479	88
204170_s_at	1.32381	714.625	1.37967	3292.9	NM_001827	1164	CKS2	CDC28 protein kinase regulatory subunit 2	9:91115932	625	299	327	250	177	412	199	536	270
208433_s_at	1.32365	247.011	1.79737	312.665	NM_017522	7804	LRP8	low density lipoprotein receptor-related protein 8, apolipoprotein e receptor	1:-53483799; 1:-53483804	654	418	150	161	179	122	283	221	173
218336_at	1.32031	691.216	1.57858	2972.06	NM_012394	5202	PFDN2	prefoldin subunit 2	1:-159336970	614	318	526	389	412	459	327	349	626
214427_at	1.32028	507.396	1.32665	1227.05	NM_006170	4839	NOL1	nucleolar protein 1, 120kDa	12:-6536297	309	190	499	593	546	460	673	442	641
218208_at	1.32028	452.894	1.44994	1220.98	NM_025078	80148	PQLC1	PQ loop repeat containing 1	18:-75763475	374	341	576	641	661	595	416	246	649
212481_s_at	1.31929	484.689	1.44198	1178.97	AI214061	7171	TPM4	tropomyosin 4	19:16048324	657	596	680	431	666	655	431	331	575
219684_at	1.31898	302.471	2.13937	867.616	NM_022147	64108	RTP4	receptor (chemosensory) transporter protein 4	3:188568861	223	208	380	404	352	237	152	145	361
200931_s_at	1.3179	1057.39	1.28539	4953.42	NM_014000	7414	VCL	vinculin	10:75427877	536	513	607	679	676	681	665	593	676
201161_s_at	1.3178	1161.01	1.83705	1828.44	NM_003651	8531	CSDA	cold shock domain protein A	12:-10742955	341	174	258	162	100	196	625	473	257
212506_at	1.31723	634.276	1.24151	1893.37	AL135735	8301	PICALM	phosphatidylinositol binding clathrin assembly protein	11:-85346133	593	612	653	626	673	635	356	594	582
201555_at	1.3161	489.646	1.49036	2417.35	NM_002388	4172	MCM3	minichromosome maintenance complex component 3	6:-52236770	244	138	378	380	340	379	535	373	627
203068_at	1.31573	276.698	1.5499	622.237	NM_014851	9903	KLHL21	kelch-like 21 (Drosophila)	1:-6573371	213	82	547	555	542	604	664	419	383
205485_at	1.3155	63.7825	4.74253	270.141	NM_000540	6261	RYR1	ryanodine receptor 1 (skeletal)	19:43616179	71	42	82	124	70	310	29	115	171
203167_at	1.31425	435.186	1.48401	810.952	NM_003255	7077	TIMP2	TIMP metallopeptidase inhibitor 2	17:-74360657	557	602	636	645	649	652	601	348	504
210115_at	1.31425	298.082	1.64333	587.586	L05096	116832	RPL39L	ribosomal protein L39-like	3:-188321434	270	369	320	204	371	265	338	313	296
220230_s_at	1.31265	242.779	1.84278	504.386	NM_016229	51700	CYB5R2	cytochrome b5 reductase 2	11:-7642902	245	591	218	253	383	334	55	269	313
209787_s_at	1.31247	462.101	1.49266	2086.92	BC001282	10473	HMGN4	high mobility group nucleosomal binding domain 4	6:26646550	193	105	600	448	555	546	257	530	401
214769_at	1.31237	51.3283	3.18711	78.4159	AF052117	1183	CLCN4	chloride channel 4	X:10084984	42	36	52	37	53	25	9	30	13
210105_s_at	1.31102	427.809	1.54855	1493.58	M14333	2534	FYN	FYN oncogene related to SRC, FGR, YES	6:-112089179; 6:-112089186	472	632	480	607	583	457	545	434	541
219540_at	1.31076	141.001	1.25733	561.221	AU150728	10308	ZNF267	zinc finger protein 267	16:31792660	651	545	672	594	662	506	519	477	530
208729_x_at	1.30987	7447.34	1.49949	14715.1	D83043	3106	HLA-B	major histocompatibility complex, class I, B	6:-31429629	439	620	628	608	558	488	212	343	679
209642_at	1.30966	127.529	1.8503	520.14	AF043294	699	BUB1	BUB1 budding uninhibited by benzimidazoles 1 homolog (yeast)	2:-111111882	275	99	155	68	84	171	198	233	132
203430_at	1.30929	1061.18	1.5003	5768.15	NM_014320	23593	HEBP2	heme binding protein 2	6:138767028	667	649	366	343	514	650	341	451	595
203879_at	1.30889	323.584	1.77464	1023.14	U86453	5293	PIK3CD	phosphoinositide-3-kinase, catalytic, delta polypeptide	1:9634376	392	438	271	625	420	159	166	316	491
221269_s_at	1.30885	1064.46	1.31832	1282.37	NM_031286	83442	SH3BGRL3	SH3 domain binding glutamic acid-rich protein like 3	1:26478799	570	638	624	612	545	572	532	592	674
212687_at	1.30834	889.785	1.26767	2566.69	AL110164	3987	LIMS1	LIM and senescent cell antigen-like domains 1	2:108571198	629	550	606	590	625	665	466	569	515
205596_s_at	1.30514	386.479	1.42769	1001.23	AY014180	64750	SMURF2	SMAD specific E3 ubiquitin protein ligase 2	17:-59971196	605	436	630	466	556	542	66	524	255
213404_s_at	1.30489	857.517	1.29858	2361	BF033683	6009	RHEB	Ras homolog enriched in brain	7:-150794031	511	326	588	470	463	641	520	655	492
208961_s_at	1.30433	284.565	1.53384	1740.29	AB017493	1316	KLF6	Kruppel-like factor 6	10:-3811240	538	670	676	634	499	671	570	554	596
211963_s_at	1.3042	1877.71	1.29196	3638.63	AL516350	10092	ARPC5	actin related protein 2/3 complex, subunit 5, 16kDa	1:-181861956	585	474	586	535	603	621	321	662	639
203139_at	1.30411	400.481	1.86619	1198.38	NM_004938	1612	DAPK1	death-associated protein kinase 1	9:89302575	372	334	165	349	482	202	62	241	315
203764_at	1.30398	140.65	1.68155	461.302	NM_014750	9787	DLG7	discs, large homolog 7 (Drosophila)	14:-54684600	416	338	114	94	75	205	242	531	81
205109_s_at	1.30269	106.136	1.89148	328.484	NM_015320	50649	ARHGEF4	Rho guanine nucleotide exchange factor (GEF) 4	2:131390693	394	156	246	288	178	232	597	281	328
200822_x_at	1.30209	2418.21	1.37787	8932.98	NM_000365	7167	TPI1	triosephosphate isomerase 1	12:6846966	426	283	551	580	524	586	663	602	662
220094_s_at	1.3017	416.137	1.39754	1288.47	NM_022102	63933	CCDC90A	coiled-coil domain containing 90A	6:-13898999	504	489	610	280	522	539	533	587	519
209648_x_at	1.3013	123.26	1.42824	429.797	AL136896	9655	SOCS5	suppressor of cytokine signaling 5	2:46779602; 2:46779852	406	296	641	638	643	574	614	648	350
218447_at	1.30086	430.707	1.5135	1756.77	NM_020188	56942	C16orf61	chromosome 16 open reading frame 61	16:-79567201	450	252	335	295	241	537	131	265	344
222233_s_at	1.2998	119.725	1.37335	313.554	AK022922	64421	DCLRE1C	DNA cross-link repair 1C (PSO2 homolog, S. cerevisiae)	10:-14988878	229	501	521	345	285	538	417	677	349
211954_s_at	1.29968	552.101	1.33906	1566.94	BC000947	3843	RANBP5	RAN binding protein 5	13:97403929	419	249	557	598	584	633	567	671	553
222036_s_at	1.29905	196.358	1.58656	1303.89	AI859865	4173	MCM4	minichromosome maintenance complex component 4	8:49036046	276	157	546	269	395	368	541	374	408
212247_at	1.29749	369.185	1.50977	993.602	AW008531	23165	NUP205	nucleoporin 205kDa	7:134893227	398	320	341	539	349	495	569	504	319
220178_at	1.2965	326.654	1.72302	503.702	NM_021731	126321	C19orf28	chromosome 19 open reading frame 28	19:-3495197; 19:-3489264	607	425	649	599	632	653	578	239	446
202531_at	1.29635	441.753	1.40475	1122.99	NM_002198	3659	IRF1	interferon regulatory factor 1	5:-131846683	573	480	553	674	626	308	446	503	668
203405_at	1.29537	440.701	1.53909	1101.75	NM_003720	8624	PSMG1	proteasome (prosome, macropain) assembly chaperone 1	21:-39469263	644	322	387	189	292	352	317	571	285
204447_at	1.29524	106.716	1.64942	558.481	NM_014731	9762	ProSAPiP1	ProSAPiP1 protein	20:-3091272	242	222	222	383	554	407	571	439	406
218886_at	1.29437	153.651	1.86988	541.189	NM_017906	55003	PAK1IP1	PAK1 interacting protein 1	6:10803173	516	363	386	314	318	330	464	217	205
214104_at	1.29206	148.487	3.07455	664.819	AI703188	23432	GPR161	G protein-coupled receptor 161	1:-166326307; 1:-166320622	170	172	204	156	280	154	467	133	141
200090_at	1.29162	915.507	1.30286	5941	BG168896	2339	FNTA	farnesyltransferase, CAAX box, alpha	8:43030598	491	297	667	651	639	608	629	541	597
204040_at	1.29084	192.442	1.37547	593.749	NM_014746	9781	RNF144A	ring finger protein 144A	2:6974973	521	427	660	613	669	657	506	637	564
220892_s_at	1.29083	336.678	1.87789	333.479	NM_021154	29968	PSAT1	phosphoserine aminotransferase 1	9:80101878	69	212	45	80	14	116	172	236	114
219437_s_at	1.29043	212.819	1.42917	711.97	NM_013275	29123	ANKRD11	ankyrin repeat domain 11	16:-87861535	642	409	670	658	250	486	291	579	646
212816_s_at	1.29011	204.559	2.21338	516.538	BE613178	875	CBS	cystathionine-beta-synthase	21:-43346371	30	33	163	46	80	112	46	131	244
204244_s_at	1.28967	132.865	1.66055	529.937	NM_006716	10926	DBF4	DBF4 homolog (S. cerevisiae)	7:87343479	482	470	289	154	262	365	249	497	112
215313_x_at	1.28929	7430.72	1.25619	30533.2	AA573862	3105	HLA-A	major histocompatibility complex, class I, A	6:30018309	612	609	673	660	678	632	412	337	681
209815_at	1.28903	95.1396	1.8252	387.854	BG054916	5727	PTCH1	patched homolog 1 (Drosophila)	9:-97245084	114	52	183	282	510	216	60	228	152
203687_at	1.28662	213.672	2.24733	727.073	NM_002996	6376	CX3CL1	chemokine (C-X3-C motif) ligand 1	16:55963914	46	681	62	494	130	113	361	197	382
203927_at	1.28651	196.688	1.34321	620.741	NM_004556	4794	NFKBIE	nuclear factor of kappa light polypeptide gene enhancer in B-cells inhibitor, epsilon	6:-44333880	412	361	453	425	416	296	316	558	581
218902_at	1.28561	225.762	1.80219	613.921	NM_017617	4851	NOTCH1	Notch homolog 1, translocation-associated (Drosophila)	9:-138508716	228	490	419	586	300	423	666	414	356
220651_s_at	1.28522	142.6	2.58213	315.486	NM_018518	55388	MCM10	minichromosome maintenance complex component 10	10:13243586	159	182	36	38	21	67	132	105	47
201930_at	1.28491	666.982	1.64581	2427.44	NM_005915	4175	MCM6	minichromosome maintenance complex component 6	2:-136313673	420	196	269	215	299	371	313	353	245
204820_s_at	1.28284	575.858	1.37996	2531.43	NM_006994	10384	BTN3A3	butyrophilin, subfamily 3, member A3	6:26548741	646	646	520	676	595	503	144	474	509
221050_s_at	1.2819	317.031	1.23874	666.4	NM_019096	54676	GTPBP2	GTP binding protein 2	6:-43696196	518	406	595	650	399	594	647	606	667
207011_s_at	1.28177	388.895	1.6887	822.663	NM_002821	5754	PTK7	PTK7 protein tyrosine kinase 7	6:43152006	631	645	599	528	442	516	602	376	652
218757_s_at	1.28171	184.934	1.22501	966.914	NM_023010	65109	UPF3B	UPF3 regulator of nonsense transcripts homolog B (yeast)	X:-118852016	452	351	491	627	642	647	577	646	569
212563_at	1.28111	313.379	2.07537	945.362	BG491842	23246	BOP1	block of proliferation 1	8:-145456863	161	92	339	167	88	281	551	142	431
201695_s_at	1.27958	345.784	1.37152	1237.47	NM_000270	4860	NP	nucleoside phosphorylase	14:20007381	679	603	373	569	233	484	600	619	475
204786_s_at	1.27908	90.0151	1.81862	369.451	L41944	3455	IFNAR2	interferon (alpha, beta and omega) receptor 2	21:33524100	575	519	617	390	404	278	209	122	238
202900_s_at	1.27827	240.31	1.36628	748.835	NM_002532	4927	NUP88	nucleoporin 88kDa	17:-5230143	510	331	473	501	360	496	274	640	310
200009_at	1.278	2348.79	1.32049	8937.82	NM_001494	2665	GDI2	GDP dissociation inhibitor 2	10:-5847192	594	589	587	449	644	637	487	476	630
213170_at	1.27729	225.21	1.53186	779.229	AA406605	2882	GPX7	glutathione peroxidase 7	1:52840631	299	211	390	246	295	543	307	499	488
214004_s_at	1.27554	614.574	1.67746	1764.03	AI806207	9686	VGLL4	vestigial like 4 (Drosophila)	3:-11572543	660	527	679	596	629	643	304	516	663
218424_s_at	1.27387	338.229	1.42319	1055.1	NM_018234	55240	STEAP3	STEAP family member 3	2:119697853	382	264	331	401	282	440	456	441	632
201478_s_at	1.27316	352.345	1.60133	1431.86	U59151	1736	DKC1	dyskeratosis congenita 1, dyskerin	X:153644343	418	220	342	316	337	568	376	597	450
214797_s_at	1.27311	142.705	1.51823	285.105	BC000281	5129	PCTK3	PCTAIRE protein kinase 3	1:203740349	296	61	529	669	506	353	649	462	661
210559_s_at	1.27299	404.968	1.41298	1061.93	D88357	983	CDC2	cell division cycle 2, G1 to S and G2 to M	10:62208241; 10:62209916	445	467	227	121	143	298	391	464	288
221985_at	1.27287	242.869	1.49348	584.867	AW006750	54800	KLHL24	kelch-like 24 (Drosophila)	3:184836104	560	626	618	330	563	609	381	430	594
219065_s_at	1.27245	354.672	1.37592	1422.53	NM_015955	51072	MEMO1	mediator of cell motility 1	2:-31946398	620	523	591	368	501	570	410	620	375
212350_at	1.26701	353.434	1.47532	1068.29	AB029031	23216	TBC1D1	TBC1 (tre-2/USP6, BUB2, cdc16) domain family, member 1	4:37569114	358	379	393	392	325	376	80	272	518
221522_at	1.26667	298.992	1.40571	1132.26	AL136784	84079	ANKRD27	ankyrin repeat domain 27 (VPS9 domain)	19:-37779746	519	449	545	474	547	554	440	670	468
201670_s_at	1.2661	395.13	1.38493	1804.63	M68956	4082	MARCKS	myristoylated alanine-rich protein kinase C substrate	6:114285219	670	650	678	665	599	654	404	649	645
212174_at	1.26532	328.195	1.49303	911.621	W02312	204	AK2	adenylate kinase 2	1:-33246172; 1:-33251169	364	108	250	381	284	328	488	423	427
202504_at	1.26529	650.676	3.72743	1633.1	NM_012101	23650	TRIM29	tripartite motif-containing 29	11:-119487203	41	521	14	88	59	23	241	61	57
218497_s_at	1.26513	431.173	1.38669	811.781	NM_002936	246243	RNASEH1	ribonuclease H1	2:-3570567	530	439	449	354	455	306	273	480	327
218080_x_at	1.26365	498.753	1.29543	983.597	NM_007051	11124	FAF1	Fas (TNFRSF6) associated factor 1	1:-50679522	321	243	572	576	552	622	420	664	548
219212_at	1.26326	287.95	1.47805	1344.87	NM_016299	51182	HSPA14	heat shock 70kDa protein 14	10:14920266	443	319	508	254	457	579	349	421	410
204510_at	1.26283	178.239	1.38165	639.71	NM_003503	8317	CDC7	cell division cycle 7 homolog (S. cerevisiae)	1:91739031	109	171	385	276	259	377	575	445	330
212430_at	1.26266	297.725	1.61673	609.727	AL109955	55544	RBM38	RNA binding motif protein 38	20:55399869	316	303	416	336	405	250	148	406	452
218566_s_at	1.26263	166.191	1.31001	710.879	NM_012124	26973	CHORDC1	cysteine and histidine-rich domain (CHORD)-containing 1	11:-89574264	562	522	577	422	637	526	442	557	246
209545_s_at	1.26262	545.796	1.4484	1419.56	AF064824	8767	RIPK2	receptor-interacting serine-threonine kinase 2	8:90839109	499	217	513	256	304	272	232	231	434
202483_s_at	1.26162	704.228	1.58264	3160.32	NM_002882	5902	RANBP1	RAN binding protein 1	22:18485023	603	372	434	263	218	329	276	519	466
212923_s_at	1.26018	277.094	1.32219	943.406	AK024828	221749	C6orf145	chromosome 6 open reading frame 145	6:-3667852	387	579	411	589	565	431	513	578	484
217938_s_at	1.2596	949.814	1.38468	3817.79	NM_020122	56888	KCMF1	potassium channel modulatory factor 1	2:85051741	532	446	477	405	488	508	334	495	483
218092_s_at	1.25956	518.18	1.38719	1005.14	NM_004504	3267	HRB	HIV-1 Rev binding protein	2:228045285	658	544	530	416	470	601	145	595	428
41037_at	1.25947	143.005	1.64796	439.314	U63824	7004	TEAD4	TEA domain family member 4	12:2938756; 12:2939222	315	472	514	385	456	437	634	455	487
213346_at	1.25936	195.071	1.34651	462.783	BE748563	93081	C13orf27	chromosome 13 open reading frame 27	13:-102216467	381	306	431	272	356	578	188	615	538
212295_s_at	1.25897	564.6	1.42341	1974.68	AA148507	6541	SLC7A1	solute carrier family 7 (cationic amino acid transporter, y+ system), member 1	13:-28981551	367	604	354	616	465	590	667	575	566
202440_s_at	1.25854	229.431	1.31601	817.705	NM_005418	6764	ST5	suppression of tumorigenicity 5	11:-8671475	319	405	596	662	640	677	654	513	650
204500_s_at	1.25851	199.122	1.50671	419.31	NM_015239	23287	AGTPBP1	ATP/GTP binding protein 1	9:-87351274	512	246	255	418	249	445	165	529	188
209822_s_at	1.25837	236.813	1.75377	497.705	L22431	7436	VLDLR	very low density lipoprotein receptor	9:2611792	345	199	226	293	214	303	111	301	234
212590_at	1.25652	195.841	1.42886	464.505	AI431643	22800	RRAS2	related RAS viral (r-ras) oncogene homolog 2	11:-14256041	529	557	294	178	202	135	100	487	273
205595_at	1.25624	366.263	2.88045	391.556	NM_001944	1830	DSG3	desmoglein 3 (pemphigus vulgaris antigen)	18:27281729	21	22	37	279	79	104	529	644	229
213133_s_at	1.25375	392.36	1.43318	1253.17	AW237404	2653	GCSH	glycine cleavage system protein H (aminomethyl carrier)	16:-79673431	183	227	604	329	401	613	256	623	558
218898_at	1.25289	239.819	1.37253	499.916	NM_024792	79850	FAM57A	family with sequence similarity 57, member A	17:582596	135	95	376	547	505	651	619	674	587
202965_s_at	1.25211	205.463	8.28796	540.71	NM_014289	827	CAPN6	calpain 6	X:-110374987	19	3	24	126	111	10	182	17	27
218057_x_at	1.25204	359.401	1.30258	991.065	NM_006067	10328	COX4NB	COX4 neighbor	16:-84369736	544	329	478	391	327	478	161	510	393
204584_at	1.25121	280.536	5.02683	487.91	AI653981	3897	L1CAM	L1 cell adhesion molecule	X:-152780580	51	594	117	139	369	220	40	40	266
204641_at	1.24978	312.248	1.47531	798.148	NM_002497	4751	NEK2	NIMA (never in mitosis gene a)-related kinase 2	1:-209902744	263	154	281	159	309	473	114	436	277
208309_s_at	1.24787	302.523	1.77911	352.417	NM_006785	10892	MALT1	mucosa associated lymphoid tissue lymphoma translocation gene 1	18:54489597	401	267	302	268	159	191	295	251	126
200844_s_at	1.2465	1862.02	1.29161	4230.95	BE869583	9588	PRDX6	peroxiredoxin 6	1:171713108	666	304	675	667	648	649	587	483	665
221931_s_at	1.24649	189.503	1.37363	1147.06	AV701173	81929	SEH1L	SEH1-like (S. cerevisiae)	18:12937982	434	285	541	581	573	461	639	666	392
204600_at	1.24526	472.286	2.00852	1443.37	NM_004443	2049	EPHB3	EPH receptor B3	3:185762280	112	517	420	531	425	414	659	468	615
206571_s_at	1.24444	276.995	1.85273	759.846	NM_004834	9448	MAP4K4	mitogen-activated protein kinase kinase kinase kinase 4	2:101680919	393	456	403	379	217	358	250	182	363
209015_s_at	1.24439	357.063	1.54339	719.811	BC002446	10049	DNAJB6	DnaJ (Hsp40) homolog, subfamily B, member 6	7:156822471; 7:156822470	465	547	621	548	606	673	573	669	528
218726_at	1.24391	178.046	1.77507	571.197	NM_018410	55355	HJURP	Holliday junction recognition protein	2:-234410225	301	241	95	63	65	110	146	369	162
201663_s_at	1.24331	315.601	1.71513	1138.88	NM_005496	10051	SMC4	structural maintenance of chromosomes 4	3:161600123; 3:161601040	172	228	276	194	184	289	192	380	317
211501_s_at	1.24291	555.567	1.33117	1052.95	BC001173	8662	EIF3B	eukaryotic translation initiation factor 3, subunit B	7:2360999	460	457	584	529	394	610	331	599	638
209193_at	1.24181	354.601	1.89371	916.91	M24779	5292	PIM1	pim-1 oncogene	6:37245963	233	328	440	542	600	319	547	128	602
221879_at	1.24156	111.21	1.58066	466.433	AA886335	91860	CALML4	calmodulin-like 4	15:-66270097	288	167	548	258	161	315	556	149	287
203519_s_at	1.24101	391.841	1.27754	1014.93	NM_015542	26019	UPF2	UPF2 regulator of nonsense transcripts homolog (yeast)	10:-12002027	525	486	538	458	489	625	490	641	536
200054_at	1.23974	288.851	1.27302	603.152	NM_003904	8882	ZNF259	zinc finger protein 259	11:-116154486	558	611	501	532	574	534	207	574	554
201584_s_at	1.23965	469.178	1.47462	1854.82	NM_005804	10212	DDX39	DEAD (Asp-Glu-Ala-Asp) box polypeptide 39	19:-14380630	503	395	585	480	429	583	486	628	545
203137_at	1.23915	405.743	1.42366	1275.83	NM_004906	9589	WTAP	Wilms tumor 1 associated protein	6:160068141; 6:160068609	458	440	505	611	658	646	563	660	459
221677_s_at	1.2389	192.42	1.3799	477.562	AF232674	29980	DONSON	downstream neighbor of SON	21:-33872081	355	293	442	363	355	401	402	589	347
214106_s_at	1.23726	368.415	1.56576	810.663	AI762113	2762	GMDS	GDP-mannose 4,6-dehydratase	6:-1569040	379	535	248	233	320	314	432	481	302
210357_s_at	1.23714	178.277	1.61403	454.019	BC000669	54498	SMOX	spermine oxidase	20:4077449	435	465	240	443	464	243	641	486	417
202759_s_at	1.23703	348.694	1.29283	1405.23	BE879367	11217	AKAP2	A kinase (PRKA) anchor protein 2	9:111850796	568	301	435	656	619	411	610	642	664
202657_s_at	1.23645	280.39	1.31227	1246.94	NM_014755	9792	SERTAD2	SERTA domain containing 2	2:-64712259	500	592	563	600	519	483	562	636	517
203690_at	1.23626	120.091	1.3567	526.095	NM_006322	10426	TUBGCP3	tubulin, gamma complex associated protein 3	13:-112187328	375	411	590	663	665	667	497	679	444
211744_s_at	1.23476	191.528	1.26532	494.251	BC005930	965	CD58	CD58 molecule	1:-116858679	626	537	510	358	365	675	332	588	405
200815_s_at	1.23446	293.105	1.54111	1092.4	L13386	5048	PAFAH1B1	platelet-activating factor acetylhydrolase, isoform Ib, alpha subunit 45kDa	17:2443685	325	367	433	508	553	544	553	563	505
218758_s_at	1.23394	219.219	1.59217	457.383	NM_003683	8568	RRP1	ribosomal RNA processing 1 homolog (S. cerevisiae)	21:44033845	463	343	623	512	544	299	621	300	465
212456_at	1.23377	553.738	1.27383	1005.55	AB014564	23277	KIAA0664	KIAA0664	17:-2539429	643	614	625	680	588	663	681	591	657
209056_s_at	1.2328	338.432	1.30239	1095.58	NM_001253	988	CDC5L	CDC5 cell division cycle 5-like (S. pombe)	6:44463279	548	394	611	421	523	630	596	556	424
214315_x_at	1.23274	1096.65	1.30622	3518.2	AI348935	811	CALR	calreticulin	19:12910422	480	641	674	670	681	648	668	647	680
213088_s_at	1.23231	531.05	1.46657	1883.24	BE551340	23234	DNAJC9	DnaJ (Hsp40) homolog, subfamily C, member 9	10:-74672589	429	420	556	462	462	624	584	396	377
209408_at	1.23215	322.612	1.69691	1144.11	U63743	11004	KIF2C	kinesin family member 2C	1:44978137	277	266	111	127	92	145	496	293	218
204315_s_at	1.23056	132.622	1.72564	357.189	AI340239	51512	GTSE1	G-2 and S-phase expressed 1	22:45071475	359	466	264	76	89	77	452	378	380
208152_s_at	1.23055	795.262	1.34945	3458.92	NM_004728	9188	DDX21	DEAD (Asp-Glu-Ala-Asp) box polypeptide 21	10:70385897	422	384	629	507	384	614	586	586	613
208855_s_at	1.22978	1779.67	1.43815	5476.65	AF083420	8428	STK24	serine/threonine kinase 24 (STE20 homolog, yeast)	13:-97900455	307	414	662	668	677	678	531	610	568
204059_s_at	1.22961	506.459	1.42896	586.841	NM_002395	4199	ME1	malic enzyme 1, NADP(+)-dependent, cytosolic	6:-83976830	678	555	421	285	144	238	671	240	160
202729_s_at	1.22951	446	1.62902	1567.23	NM_000627	4052	LTBP1	latent transforming growth factor beta binding protein 1	2:33213180; 2:33025895	408	387	312	504	654	522	645	147	432
218486_at	1.22805	199.365	1.63364	660.717	AA149594	8462	KLF11	Kruppel-like factor 11	2:10101132	314	415	272	397	380	429	265	488	338
221046_s_at	1.22802	206.534	1.44569	957.702	NM_014170	29083	GTPBP8	GTP-binding protein 8 (putative)	3:114192489	537	569	645	499	610	499	353	540	520
212378_at	1.22728	264.224	1.34802	881.979	NM_000819	2618	GART	phosphoribosylglycinamide formyltransferase, phosphoribosylglycinamide synthetase, phosphoribosylaminoimidazole synthetase	21:-33818186; 21:-33798143	619	250	567	367	409	500	201	584	495
202679_at	1.22669	348.716	1.29441	1152.51	NM_000271	4864	NPC1	Niemann-Pick disease, type C1	18:-19365460	468	510	488	610	479	581	480	398	513
32069_at	1.22664	425.07	1.38618	544.506	AB014515	9683	N4BP1	NEDD4 binding protein 1	16:-47130139	637	644	566	554	571	458	530	362	306
202244_at	1.2265	2222.6	1.36166	8792.35	NM_002796	5692	PSMB4	proteasome (prosome, macropain) subunit, beta type, 4	1:149638664	606	389	648	573	633	645	415	525	622
212055_at	1.22612	445.006	1.35673	1236.16	BF689173	25941	C18orf10	chromosome 18 open reading frame 10	18:-32630032	417	256	549	495	516	660	229	659	570
218854_at	1.22569	288.081	1.36331	973.797	NM_013352	29940	DSE	dermatan sulfate epimerase	6:116798802; 6:116707975	551	476	598	579	641	676	398	470	374
209449_at	1.22477	215.67	1.47788	855.281	AF196468	57819	LSM2	LSM2 homolog, U6 small nuclear RNA associated (S. cerevisiae)	6:-31873154; 6_cox_hap1:-3211250; 6_qbl_hap2:-3012767	441	374	413	407	507	455	453	413	659
203921_at	1.22452	203.519	2.11465	381.208	NM_004267	9435	CHST2	carbohydrate (N-acetylglucosamine-6-O) sulfotransferase 2	3:144321357	101	225	97	226	121	59	18	242	202
211594_s_at	1.22385	497.179	1.44136	1104.86	AB049636	65005	MRPL9	mitochondrial ribosomal protein L9	1:-149998748	546	265	605	457	526	662	471	629	550
209448_at	1.22348	499.794	1.51232	1143.72	BC002439	10553	HTATIP2	HIV-1 Tat interactive protein 2, 30kDa	11:20341806; 11:20341864; 11:20341822; 11:20342262; 11:20341978	466	429	417	320	267	388	246	527	214
209406_at	1.22344	156.203	1.86474	309.26	AF095192	9532	BAG2	BCL2-associated athanogene 2	6:57145292	120	79	259	163	132	222	576	157	150
203276_at	1.22316	215.52	1.41882	376.46	NM_005573	4001	LMNB1	lamin B1	5:126140731	431	538	471	310	271	288	378	484	336
212607_at	1.22275	295.198	1.60856	1236.52	N32526	10000	AKT3	v-akt murine thymoma viral oncogene homolog 3 (protein kinase B, gamma)	1:-241718157; 1:-241733106	226	140	668	465	451	367	28	323	610
218355_at	1.22197	216.932	1.69199	635.316	NM_012310	24137	KIF4A	kinesin family member 4A	X:69426619	328	269	178	83	175	260	365	549	176
212368_at	1.2219	205.666	1.36525	1318.9	AA972711	23036	ZNF292	zinc finger protein 292	6:87921987	638	423	554	639	616	598	616	652	651
200860_s_at	1.22126	684.235	1.3955	2862.39	BC000779	23019	CNOT1	CCR4-NOT transcription complex, subunit 1	16:-57111356; 16:-57134741	421	356	496	644	509	607	477	428	598
222221_x_at	1.22102	345.609	1.2359	520.09	AY007161	10938	EHD1	EH-domain containing 1	11:-64376783	677	660	578	622	322	588	552	633	666
218051_s_at	1.22074	274.771	1.6027	832.513	NM_022908	64943	NT5DC2	5'-nucleotidase domain containing 2	3:-52533442	641	570	287	317	145	393	277	515	419
200989_at	1.22069	1143.17	1.24021	4185.78	NM_001530	3091	HIF1A	hypoxia-inducible factor 1, alpha subunit (basic helix-loop-helix transcription factor)	14:61231991	674	668	394	614	549	616	510	375	400
202937_x_at	1.22039	261.678	1.65042	713.981	AL022316	27341	CTA-126B4.3	CGI-96 protein	22:-41238518	681	661	659	386	240	394	205	370	588
202910_s_at	1.21964	379.473	1.55002	476.368	NM_001784	976	CD97	CD97 molecule	19:14353212	330	487	307	602	298	163	679	229	353
201875_s_at	1.21935	545.393	1.68104	1574.88	NM_024569	9019	MPZL1	myelin protein zero-like 1	1:165957831	520	461	463	553	527	480	522	446	591
207719_x_at	1.21919	328.888	1.36566	1127.92	NM_014812	9859	CEP170	centrosomal protein 170kDa	1:-241354353	402	419	533	605	617	628	525	582	415
203418_at	1.21918	202.058	1.874	408.237	NM_001237	890	CCNA2	cyclin A2	4:-122957974	252	107	101	32	47	111	121	254	128
210895_s_at	1.21895	191.649	1.33691	461.535	L25259	942	CD86	CD86 molecule	3:123256910; 3:123279439	640	630	437	342	469	502	99	643	494
213485_s_at	1.21887	271.949	1.31949	914.887	AK000002	89845	ABCC10	ATP-binding cassette, sub-family C (CFTR/MRP), member 10	6:43507466	528	445	583	659	477	656	672	514	578
204240_s_at	1.21883	126.052	1.31263	376.183	NM_006444	10592	SMC2	structural maintenance of chromosomes 2	9:105896361; 9:105896651	506	381	306	213	186	448	200	680	311
221903_s_at	1.2181	261.432	1.48389	771.251	BE046443	1540	CYLD	cylindromatosis (turban tumor syndrome)	16:49333461; 16:49333529	413	454	486	477	368	406	407	244	476
203092_at	1.21773	327.744	1.77782	354.557	AF026030	10469	TIMM44	translocase of inner mitochondrial membrane 44 homolog (yeast)	19:-7897603	659	93	626	544	647	644	528	178	341
209504_s_at	1.21764	225.615	1.99358	367.544	AF081583	58473	PLEKHB1	pleckstrin homology domain containing, family B (evectins) member 1	11:73034870	29	24	173	136	138	68	81	630	332
204616_at	1.21732	329.37	1.29514	1294.53	NM_006002	7347	UCHL3	ubiquitin carboxyl-terminal esterase L3 (ubiquitin thiolesterase)	13:75021927	652	671	451	550	538	596	230	663	514
202384_s_at	1.2173	149.93	1.3936	476.683	AW167713	6949	TCOF1	Treacher Collins-Franceschetti syndrome 1	5:149717427	623	564	647	637	663	507	603	393	618
219863_at	1.21649	428.956	1.69065	803.232	NM_016323	51191	HERC5	hect domain and RLD 5	4:89597290	187	78	237	302	474	259	23	177	282
218104_at	1.21634	286.745	1.33186	790.337	NM_017746	54881	TEX10	testis expressed 10	9:-102104190	569	443	405	513	467	453	462	632	500
221839_s_at	1.21587	606.539	1.33544	1264.12	AK026088	55833	UBAP2	ubiquitin associated protein 2	9:-33911690	577	479	644	675	670	634	564	422	640
207127_s_at	1.21568	391.036	1.22923	925.756	NM_021644	3189	HNRPH3	heterogeneous nuclear ribonucleoprotein H3 (2H9)	10:69761884	553	468	671	647	656	564	441	635	563
201192_s_at	1.21547	286.693	1.26614	674.357	NM_006224	5306	PITPNA	phosphatidylinositol transfer protein, alpha	17:-1368034	454	599	448	506	631	599	461	673	552
212613_at	1.21546	208.064	1.50712	336.484	AI991252	11118	BTN3A2	butyrophilin, subfamily 3, member A2	6:26473376	639	675	458	619	491	370	79	604	242
209317_at	1.21516	204.844	1.32053	993.606	AF008442	9533	POLR1C	polymerase (RNA) I polypeptide C, 30kDa	6:43592768	449	204	612	536	500	612	585	431	525
212973_at	1.21492	320.851	1.27844	831.614	AI692341	22934	RPIA	ribose 5-phosphate isomerase A (ribose 5-phosphate epimerase)	2:88772290	268	362	511	437	531	336	382	621	551
213137_s_at	1.21474	201.718	1.50522	701.132	AI828880	5771	PTPN2	protein tyrosine phosphatase, non-receptor type 2	18:-12783247; 18:-12775480; 18:-12775486	534	451	597	427	567	389	500	544	422
216484_x_at	1.21347	1133.58	1.68514	3440.83	L24521	3068	HDGF	hepatoma-derived growth factor (high-mobility group protein 1-like)	1:-154978525	484	213	555	438	493	587	424	401	644
221004_s_at	1.21308	345.715	2.00536	1183.23	NM_030926	81618	ITM2C	integral membrane protein 2C	2:231437864	279	447	214	181	72	91	439	72	191
205339_at	1.21196	229.107	1.54085	470.203	NM_003035	6491	STIL	SCL/TAL1 interrupting locus	1:-47488397	249	270	229	261	173	404	393	444	146
209533_s_at	1.21133	167.334	1.37328	631.625	AF145020	9373	PLAA	phospholipase A2-activating protein	9:-26895340; 9:-26894517	656	437	560	521	513	558	418	453	447
206453_s_at	1.21101	1386.73	2.0737	1954.78	NM_016250	57447	NDRG2	NDRG family member 2	14:-20554762	45	91	428	372	601	270	236	223	624
214662_at	1.21092	185.111	1.38629	571.216	D26488	23160	WDR43	WD repeat domain 43	:	632	400	635	571	593	509	558	616	544
203904_x_at	1.21086	500.427	1.53455	717.179	NM_002231	3732	CD82	CD82 molecule	11:44543716	524	672	322	515	424	241	411	418	593
218247_s_at	1.21073	466.964	1.3503	668.603	NM_016626	51320	MEX3C	mex-3 homolog C (C. elegans)	18:-46954917	175	294	615	463	562	529	150	537	368
209939_x_at	1.2105	819.612	2.00734	1510.54	AF005775	8837	CFLAR	CASP8 and FADD-like apoptosis regulator	2:201689134	332	399	337	287	225	236	74	120	248
204693_at	1.21016	272.984	1.73867	427.351	NM_007061	11135	CDC42EP1	CDC42 effector protein (Rho GTPase binding) 1	22:36286446; 22:36286445	414	462	330	275	269	153	548	173	510
200956_s_at	1.20967	789.349	1.41579	817.962	BE795648	6749	SSRP1	structure specific recognition protein 1	11:-56850035	444	375	622	376	536	532	428	562	573
203843_at	1.20951	207.797	1.32315	393.381	AA906056	6197	RPS6KA3	ribosomal protein S6 kinase, 90kDa, polypeptide 3	X:-20077950	347	170	372	362	333	264	185	617	387
218276_s_at	1.20893	141.386	1.26331	703.687	NM_021818	60485	SAV1	salvador homolog 1 (Drosophila)	14:-50170109	464	345	642	629	672	674	449	658	635
209679_s_at	1.20816	264.782	1.38952	763.044	BC003379	57228	LOC57228	small trans-membrane and glycosylated protein	12:-49925405; 12:-49925399	601	253	472	440	328	575	499	654	577
219582_at	1.20756	270.095	2.45707	703.135	NM_024576	79627	OGFRL1	opioid growth factor receptor-like 1	6:72055197	117	76	245	97	301	126	153	94	157
210951_x_at	1.20742	423.368	1.53456	876.902	AF125393	5873	RAB27A	RAB27A, member RAS oncogene family	15:-53283093	527	507	581	441	437	301	465	152	337
202880_s_at	1.20647	214.102	1.44075	877.689	NM_004762	9267	PSCD1	pleckstrin homology, Sec7 and coiled-coil domains 1(cytohesin 1)	17:-74181725	591	631	570	592	580	419	606	627	601
221830_at	1.20647	749.517	1.789	1143.65	AI302106	5911	RAP2A	RAP2A, member of RAS oncogene family	13:96884476	584	416	418	265	239	430	293	448	438
208952_s_at	1.20618	298.267	1.4933	1154.47	AA811923	23185	LARP5	La ribonucleoprotein domain family, member 5	10:-845483	471	534	534	468	417	584	598	533	589
203956_at	1.20494	384.611	1.44178	1711.59	NM_014941	22880	MORC2	MORC family CW-type zinc finger 2	22:-29652599	608	533	613	632	623	528	503	383	309
202005_at	1.20466	535.605	1.67269	1647.75	NM_021978	6768	ST14	suppression of tumorigenicity 14 (colon carcinoma)	11:129534891	589	678	388	340	227	380	289	465	579
218947_s_at	1.20446	222.888	1.34972	694.5	NM_018109	55149	PAPD1	PAP associated domain containing 1	10:-30641764	456	325	523	378	410	589	438	601	619
215947_s_at	1.2032	554.47	1.27078	1242.1	AF090094	4946	OAZ1	ornithine decarboxylase antizyme 1	19:2220519	453	453	608	530	605	585	589	614	461
202579_x_at	1.20239	783.849	1.42621	2289.39	NM_006353	10473	HMGN4	high mobility group nucleosomal binding domain 4	6:26646550	214	118	561	339	475	547	239	611	607
218997_at	1.20135	268.992	1.56495	841.197	NM_022490	64425	POLR1E	polymerase (RNA) I polypeptide E, 53kDa	9:37475944	318	142	446	486	330	410	237	321	543
222039_at	1.20109	219.784	1.99375	729.503	AA292789	146909	KIF18B	kinesin family member 18B	17:-40358973	126	152	180	273	137	240	413	248	222
204639_at	1.20064	234.879	1.32235	521.508	NM_000022	100	ADA	adenosine deaminase	20:-42681577	598	608	445	511	247	386	518	590	388
204588_s_at	1.1992	406.89	1.26909	1077.56	NM_003982	9056	SLC7A7	solute carrier family 7 (cationic amino acid transporter, y+ system), member 7	14:-22312273	672	676	476	664	604	450	301	454	620
218223_s_at	1.19807	218.661	1.50349	580.14	NM_016274	51177	PLEKHO1	pleckstrin homology domain containing, family O member 1	1:148388793	486	520	522	519	342	456	543	403	516
213699_s_at	1.19706	3185.1	1.27937	10440.7	AA854017	10971	YWHAQ	tyrosine 3-monooxygenase/tryptophan 5-monooxygenase activation protein, theta polypeptide	2:-9641557	649	526	643	582	674	668	509	577	616
209045_at	1.19674	499.972	1.24039	1305.92	AF195530	7511	XPNPEP1	X-prolyl aminopeptidase (aminopeptidase P) 1, soluble	10:-111614513	547	422	540	609	589	487	355	532	585
219286_s_at	1.19673	286.16	1.27779	1083.38	NM_022768	64783	RBM15	RNA binding motif protein 15	1:110683467	581	355	524	556	525	550	434	387	507
214844_s_at	1.19622	261.088	1.80677	601.978	AL050069	55816	DOK5	docking protein 5	20:52525672	147	74	206	357	586	147	445	354	329
209435_s_at	1.19457	1079.04	1.59106	2543.47	BC000265	9181	ARHGEF2	rho/rac guanine nucleotide exchange factor (GEF) 2	1:-154183269	423	251	562	646	657	642	626	404	636
218308_at	1.19376	304.311	1.52207	614.421	NM_006342	10460	TACC3	transforming, acidic coiled-coil containing protein 3	4:1693063	340	542	456	116	48	446	221	159	280
202720_at	1.19319	719.972	1.56499	2113.96	NM_015641	26136	TES	testis derived transcript (3 LIM domains)	7:115650270; 7:115637816	624	673	351	557	452	322	244	276	321
212539_at	1.19297	526.061	1.44455	2107.68	AI422099	9557	CHD1L	chromodomain helicase DNA binding protein 1-like	1:145180914	645	365	493	566	444	606	590	603	609
205097_at	1.19248	277.144	2.16452	680.551	AI025519	1836	SLC26A2	solute carrier family 26 (sulfate transporter), member 2	5:149320492	292	116	504	230	485	294	253	631	390
212780_at	1.19201	351.787	1.549	736.481	AA700167	6654	SOS1	son of sevenless homolog 1 (Drosophila)	2:-39066469	320	302	350	546	421	511	135	390	389
219588_s_at	1.19177	281.395	1.3877	533.816	NM_017760	54892	NCAPG2	non-SMC condensin II complex, subunit G2	7:-158116763	243	307	359	505	361	409	612	656	355
220941_s_at	1.19116	156.956	1.84318	313.135	NM_017447	54149	C21orf91	chromosome 21 open reading frame 91	21:-18083154	335	233	188	115	93	127	136	285	220
218193_s_at	1.19093	240.901	1.79077	896.625	NM_016072	51026	GOLT1B	golgi transport 1 homolog B (S. cerevisiae)	12:21546066	559	483	455	232	314	251	524	215	221
219654_at	1.19069	182.158	2.9415	513.067	NM_014241	9200	PTPLA	protein tyrosine phosphatase-like (proline instead of catalytic arginine), member A	10:-17671965	40	53	91	131	197	106	139	171	60
209825_s_at	1.19066	420.718	2.04214	1182.69	BC002906	7371	UCK2	uridine-cytidine kinase 2	1:164063513	505	136	321	229	206	258	494	290	455
209584_x_at	1.19033	205.801	1.34993	416.924	AF165520	27350	APOBEC3C	apolipoprotein B mRNA editing enzyme, catalytic polypeptide-like 3C	22:37740210	481	450	564	577	646	349	457	567	605
218670_at	1.19007	190.718	1.27144	346.64	NM_025215	80324	PUS1	pseudouridylate synthase 1	12:130979741	613	528	665	621	581	562	540	517	576
206634_at	1.18967	197.342	5.27455	344.738	NM_005413	6496	SIX3	SIX homeobox 3	2:45022540	59	44	43	117	215	42	43	27	189
202188_at	1.18963	340.377	2.12394	692.57	NM_014669	9688	NUP93	nucleoporin 93kDa	16:55321607	380	410	232	327	128	344	112	170	154
202647_s_at	1.18854	171.066	1.49125	430.752	NM_002524	4893	NRAS	neuroblastoma RAS viral (v-ras) oncogene homolog	1:-115051107	308	185	509	214	258	465	223	561	334
204647_at	1.18835	461.619	1.61988	1156.52	NM_004838	9454	HOMER3	homer homolog 3 (Drosophila)	19:-18901011	578	642	571	187	460	638	218	425	508
219938_s_at	1.18825	161.136	1.42704	457.575	NM_024430	9050	PSTPIP2	proline-serine-threonine phosphatase interacting protein 2	18:-41817500	231	226	539	640	634	391	481	336	527
214838_at	1.18809	286.729	1.81942	783.076	AL035297	375035	SFT2D2	SFT2 domain containing 2	1:166461869	311	224	234	148	219	189	262	226	378
219143_s_at	1.18776	158.639	1.50048	418.287	NM_017793	54913	RPP25	ribonuclease P/MRP 25kDa subunit	15:-73034495	526	175	317	262	154	312	604	568	614
203263_s_at	1.18773	152.518	1.72352	396.781	AI625739	23229	ARHGEF9	Cdc42 guanine nucleotide exchange factor (GEF) 9	X:-62771572	153	115	467	216	192	169	184	521	307
201692_at	1.1853	263.474	1.34686	826.886	NM_005866	10280	OPRS1	opioid receptor, sigma 1	9:-34624719	403	144	619	476	543	519	325	447	600
206765_at	1.17719	205.569	1.5953	594.356	AF153820	3759	KCNJ2	potassium inwardly-rectifying channel, subfamily J, member 2	17:65677270	344	629	543	635	671	549	505	306	567
209626_s_at	1.17679	145.287	1.88667	387.84	AI202969	26031	OSBPL3	oxysterol binding protein-like 3	7:-24802689	290	335	216	338	220	188	475	168	161
219491_at	1.17656	219.729	1.66398	379.051	NM_024036	78999	LRFN4	leucine rich repeat and fibronectin type III domain containing 4	11:66381548	370	197	677	408	560	493	656	498	628
207551_s_at	1.17605	387.752	1.30747	990.244	NM_006800	10943	MSL3L1	male-specific lethal 3-like 1 (Drosophila)	X:11687681; X:11686198	535	600	397	454	496	381	337	600	503
202094_at	1.17584	233.127	1.89022	381.905	AA648913	332	BIRC5	baculoviral IAP repeat-containing 5 (survivin)	17:73721871	103	234	126	105	71	88	247	581	193
219983_at	1.17525	164.886	2.56682	445.941	NM_020386	57110	HRASLS	HRAS-like suppressor	3:194441611	304	493	48	52	281	50	252	123	63
205527_s_at	1.17501	146.309	1.53293	320.103	NM_015487	50628	GEMIN4	gem (nuclear organelle) associated protein 4	17:-594410	272	200	441	570	413	640	322	639	269
209680_s_at	1.17486	394.999	1.81806	334.259	BC000712	3833	KIFC1	kinesin family member C1	6:33467582; 6_qbl_hap2:4545778	96	317	102	50	28	148	469	312	239
218397_at	1.17477	293.256	1.39295	915.351	NM_018062	55120	FANCL	Fanconi anemia, complementation group L	2:-58239883	218	232	634	617	668	472	613	661	470
205495_s_at	1.17344	256.071	1.71318	322.051	NM_006433	10578	GNLY	granulysin	2:85775059; 2:85774924	352	484	65	142	187	48	24	249	271
210052_s_at	1.17292	498.235	1.83285	1140.41	AF098158	22974	TPX2	TPX2, microtubule-associated, homolog (Xenopus laevis)	20:29790564	132	147	100	102	74	125	282	338	183
204733_at	1.172	627.547	5.52836	1102.91	NM_002774	5653	KLK6	kallikrein-related peptidase 6	19:-56153699	38	37	31	107	112	37	32	117	77
207697_x_at	1.17089	265.76	1.59122	450.432	NM_005874	10288	LILRB2	leukocyte immunoglobulin-like receptor, subfamily B (with TM and ITIM domains), member 2	19:-59469486	563	627	263	541	195	176	400	169	299
200687_s_at	1.16676	705.987	1.66285	1364.29	NM_012426	23450	SF3B3	splicing factor 3b, subunit 3, 130kDa	16:69115201	333	263	265	517	252	317	388	342	364
221016_s_at	1.16636	433.078	2.57333	1376.41	NM_031283	83439	TCF7L1	transcription factor 7-like 1 (T-cell specific, HMG-box)	2:85214244	39	55	93	153	209	74	82	118	300
204087_s_at	1.16521	750.828	1.69125	1628.3	NM_021095	8884	SLC5A6	solute carrier family 5 (sodium-dependent vitamin transporter), member 6	2:-27275962	597	412	231	485	385	252	206	608	443
221009_s_at	1.16474	355.116	1.8922	545.984	NM_016109	51129	ANGPTL4	angiopoietin-like 4	19:8335010	459	444	261	563	290	505	669	189	490
209870_s_at	1.16424	285.519	2.20464	436.167	AW571582	321	APBA2	amyloid beta (A4) precursor protein-binding, family A, member 2 (X11-like)	15:27001144	254	494	156	81	119	214	483	134	294
219439_at	1.16023	313.391	1.846	360.581	NM_020156	56913	C1GALT1	core 1 synthase, glycoprotein-N-acetylgalactosamine 3-beta-galactosyltransferase, 1	7:7240413	283	463	211	286	279	167	294	397	163
204469_at	1.15939	128.189	4.25353	318.03	NM_002851	5803	PTPRZ1	protein tyrosine phosphatase, receptor-type, Z polypeptide 1	7:121300394	97	575	92	150	216	46	173	85	116
209834_at	1.15928	300.021	4.63346	353.811	AB017915	9469	CHST3	carbohydrate (chondroitin 6) sulfotransferase 3	10:73394125	70	102	105	90	118	90	507	35	82
204822_at	1.15456	269.087	2.436	576.944	NM_003318	7272	TTK	TTK protein kinase	6:80771077	143	188	58	49	45	136	175	206	49
205204_at	1.15417	385.919	1.7403	721.403	NM_021077	4828	NMB	neuromedin B	15:-82999365	211	179	332	227	238	165	624	520	370
219006_at	1.15329	418.049	1.6149	644.167	NM_014165	29078	C6orf66	chromosome 6 open reading frame 66	6:-97445608	313	291	283	257	180	333	342	665	209
209791_at	1.15136	1002.15	2.5782	2093.79	AL049569	11240	PADI2	peptidyl arginine deiminase, type II	1:-17265842	415	665	72	164	136	40	67	53	155
203979_at	1.14683	585.157	1.61614	765.987	NM_000784	1593	CYP27A1	cytochrome P450, family 27, subfamily A, polypeptide 1	2:219354948	300	194	220	155	591	427	20	179	213
205671_s_at	1.14652	350.687	2.87408	498.511	NM_002120	3112	HLA-DOB	major histocompatibility complex, class II, DO beta	6_cox_hap1:-4161397; 6:-32888518	185	96	81	114	49	54	379	43	61
206734_at	1.14521	231.857	1.93644	386.467	NM_003772	8690	JRKL	jerky homolog-like (mouse)	11:95763461	196	404	186	311	358	175	266	146	142
203702_s_at	1.14446	554.746	6.69729	690.908	AL043927	9654	TTLL4	tubulin tyrosine ligase-like family, member 4	2:219283886	67	56	59	62	25	105	21	20	26
203805_s_at	1.14437	212.208	1.68448	396.775	AW083279	2175	FANCA	Fanconi anemia, complementation group A	16:-88331459; 16:-88392267	98	103	175	350	151	187	335	416	303
204048_s_at	1.13927	211.948	1.31711	593.148	AA551142	9749	PHACTR2	phosphatase and actin regulator 2	6:143971009; 6:144040794	680	656	650	606	598	669	394	566	584
219403_s_at	1.12871	129.988	1.85931	309.905	NM_006665	10855	HPSE	heparanase	4:-84435497; 4:-84435491	599	562	201	137	245	212	281	160	96
207375_s_at	1.12837	219.944	1.6647	715.649	NM_002189	3601	IL15RA	interleukin 15 receptor, alpha	10:-6034340	556	559	461	533	561	318	222	256	479
213413_at	1.12766	216.864	1.62669	402.098	BG434174	11036	GTF2A1L	general transcription factor IIA, 1-like	2:48698451	389	184	550	294	608	569	352	543	396
219545_at	1.12102	220.677	2.52911	414.451	NM_023930	65987	KCTD14	potassium channel tetramerisation domain containing 14	11:-77404408	116	560	145	134	373	80	155	103	167
221591_s_at	1.11999	266.09	1.5891	561.74	BC005004	54478	FAM64A	family with sequence similarity 64, member A	17:6288518	235	278	210	77	115	217	374	539	359
219566_at	1.11596	355.056	1.80617	571.775	NM_024310	79156	PLEKHF1	pleckstrin homology domain containing, family F (with FYVE domain) member 1	19:34848166	202	146	512	284	381	158	54	98	385
205692_s_at	1.11554	260.74	1.83516	505.954	NM_001775	952	CD38	CD38 molecule	4:15389028	531	231	64	138	126	93	267	93	139
210164_at	1.11476	666.226	1.9731	482.411	J03189	3002	GZMB	granzyme B (granzyme 2, cytotoxic T-lymphocyte-associated serine esterase 1)	14:-24170003	168	344	55	143	67	43	177	81	50
219555_s_at	1.11313	260.645	2.75958	370.806	NM_018455	55839	CENPN	centromere protein N	16:79597603	139	173	144	75	40	245	30	44	25
213093_at	1.11208	148.447	1.74569	409.367	AI471375	5578	PRKCA	protein kinase C, alpha	17:61729387	225	87	296	346	287	186	167	452	323
205891_at	1.11051	153.165	1.83522	319.929	NM_000676	136	ADORA2B	adenosine A2b receptor	17:15788955	130	360	44	93	52	98	430	657	308
55081_at	1.10951	363.845	2.22164	773.16	W46406	85377	MICALL1	MICAL-like 1	22:36632291	163	189	192	169	149	168	501	201	177
